# Supplementary material for: Structural and thermodynamic analyses of the β-to-α transformation in RfaH reveal principles of fold-switching proteins
Source: eLife. 2022 Oct 18;11:e76630. doi: 10.7554/eLife.76630 (PMC9683785; doi:10.7554/eLife.76630)
Supplement: Figure 2—source data 1. [file elife-76630-fig2-data1.xlsx]

## Sheet: CD-based thermal denaturation
EcNusG-KOW, pH 7							MtNusG-KOW, pH 7							MjSpt5-KOW, pH 7							hSpt5-KOW5, pH 7							EcRfaH-KOW, pH 7							VcRfaH-KOW, pH 7
Wavelength	222	nm					Wavelength	230	nm					Wavelength	222	nm					Wavelength	225	nm					Wavelength	230	nm					Wavelength	225	nm
[Protein]	0.015	mM					[Protein]	0.015	mM					[Protein]	0.015	mM					[Protein]	0.015	mM					[Protein]	0.015	mM					[Protein]	0.015	mM
Heating			Cooling				Heating			Cooling				Heating			Cooling				Heating			Cooling				Heating			Cooling				Heating			Cooling
Temperature (°C)	CD (mdeg)	DCD (mdeg)	Temperature (°C)	CD (mdeg)	DCD (mdeg)		Temperature (°C)	CD (mdeg)	DCD (mdeg)	Temperature (°C)	CD (mdeg)	DCD (mdeg)		Temperature (°C)	CD (mdeg)	DCD (mdeg)	Temperature (°C)	CD (mdeg)	DCD (mdeg)		Temperature (°C)	CD (mdeg)	DCD (mdeg)	Temperature (°C)	CD (mdeg)	DCD (mdeg)		Temperature (°C)	CD (mdeg)	DCD (mdeg)	Temperature (°C)	CD (mdeg)	DCD (mdeg)		Temperature (°C)	CD (mdeg)	DCD (mdeg)	Temperature (°C)	CD (mdeg)	DCD (mdeg)
25.35	-18.6506	0	94.69	-40.7943	-22.1437		25.11	-1.47951	0	95.13	-19.5407	-18.0612		24.88	-19.7514	0	95.1	-21.1083	-1.3569		25.07	5.59751	0	94.84	-8.42417	-14.0217		2.1	-0.183102	0	94.37	-20.555	-20.3719		19.59	-30.2165	0	94.87	-27.7528	2.4637
26.17	-18.7636	-0.113	93.7	-39.9192	-21.2686		26.21	-1.78158	-0.30207	94.05	-19.0909	-17.6114		26.15	-19.4078	0.3436	93.97	-20.357	-0.6056		26.18	5.84467	0.24716	93.83	-8.30642	-13.9039		3.11	0.301275	0.484377	93.94	-19.4967	-19.3136		21.01	-30.5236	-0.3071	93.74	-27.0105	3.206
27.13	-20.3212	-1.6706	92.73	-39.2096	-20.559		27.06	-1.42556	0.05395	92.63	-18.7993	-17.3198		27.26	-19.9934	-0.242	93.01	-21.3067	-1.5553		27	5.44234	-0.15517	92.82	-7.09644	-12.6939		4.09	-0.150537	0.032565	93.04	-20.5804	-20.3973		22.06	-30.9793	-0.7628	92.79	-27.3892	2.8273
27.94	-19.8742	-1.2236	91.87	-40.7914	-22.1408		28.04	-1.59265	-0.11314	92.06	-18.8496	-17.3701		28.27	-20.0196	-0.2682	91.71	-20.2157	-0.4643		28.37	5.59808	0.00057	91.61	-7.79427	-13.3918		5.12	0.0379833	0.221085	91.85	-20.0973	-19.9142		23.13	-32.0034	-1.7869	91.85	-27.8513	2.3652
28.99	-19.5777	-0.9271	90.97	-39.1652	-20.5146		29.12	-2.23102	-0.75151	90.78	-18.205	-16.7255		28.98	-19.2717	0.4797	90.79	-20.5817	-0.8303		28.93	5.49534	-0.10217	90.99	-6.71288	-12.3104		6.22	-0.299487	-0.116385	90.68	-19.9439	-19.7608		24.15	-31.1672	-0.9507	90.92	-28.3042	1.9123
30.1	-19.5791	-0.9285	90	-37.9017	-19.2511		29.89	-2.12623	-0.64672	89.88	-17.6447	-16.1652		29.83	-19.8919	-0.1405	89.99	-21.6928	-1.9414		30.22	5.36393	-0.23358	89.89	-6.75094	-12.3484		7.09	-0.37654	-0.193438	89.89	-20.3822	-20.1991		25.23	-31.4652	-1.2487	89.96	-27.4936	2.7229
31.09	-19.5471	-0.8965	89.14	-37.4272	-18.7766		31.18	-1.77094	-0.29143	88.81	-18.3801	-16.9006		31.22	-19.4919	0.2595	89.08	-19.8502	-0.0988		31.24	5.25673	-0.34078	88.61	-6.95049	-12.548		8.19	0.268551	0.451653	88.93	-19.9685	-19.7854		26.09	-31.5837	-1.3672	88.76	-27.0168	3.1997
32.17	-20.0749	-1.4243	87.52	-35.0502	-16.3996		32.01	-1.70625	-0.22674	87.76	-17.2336	-15.7541		32.21	-19.7809	-0.0295	87.84	-19.6486	0.1028		32.1	5.23196	-0.36555	87.97	-6.41914	-12.0167		9.13	-1.41289	-1.22979	87.95	-20.4335	-20.2504		27.18	-31.905	-1.6885	87.9	-26.702	3.5145
33.09	-19.4533	-0.8027	86.8	-35.241	-16.5904		32.82	-2.18214	-0.70263	87.03	-17.7748	-16.2953		33.24	-19.7924	-0.041	86.76	-20.4839	-0.7325		33.25	4.30162	-1.29589	86.9	-6.1423	-11.7398		10.09	-0.966712	-0.78361	86.9	-20.2692	-20.0861		28.15	-32.186	-1.9695	87.15	-27.0261	3.1904
34.05	-19.5853	-0.9347	86.08	-33.5173	-14.8667		34.26	-2.37293	-0.89342	86.03	-17.2078	-15.7283		34.02	-19.5271	0.2243	86.04	-19.6352	0.1162		33.94	5.35465	-0.24286	85.9	-5.81927	-11.4168		11.07	-1.48376	-1.30066	86.18	-19.8501	-19.667		29.02	-32.2533	-2.0368	86.12	-26.0804	4.1361
35.09	-20.3816	-1.731	84.95	-32.9801	-14.3295		34.91	-2.23889	-0.75938	84.88	-16.8285	-15.349		35.08	-18.9083	0.8431	84.59	-20.4072	-0.6558		35.04	4.54293	-1.05458	84.83	-5.39518	-10.9927		12.21	-1.04141	-0.858308	84.8	-19.3739	-19.1908		30.23	-31.9558	-1.7393	84.96	-26.0449	4.1716
36.09	-20.6875	-2.0369	83.65	-31.642	-12.9914		36.1	-2.23787	-0.75836	83.84	-16.6788	-15.1993		36.12	-19.5725	0.1789	83.85	-20.1546	-0.4032		36.2	5.46674	-0.13077	84.11	-5.92892	-11.5264		13.07	-1.12552	-0.942418	83.86	-19.4345	-19.2514		31.23	-32.2323	-2.0158	83.85	-26.0636	4.1529
37.13	-21.0597	-2.4091	82.75	-32.0415	-13.3909		36.96	-2.24701	-0.7675	83.11	-16.2615	-14.782		36.94	-19.9241	-0.1727	83.12	-19.8641	-0.1127		37.07	4.70093	-0.89658	82.74	-5.25216	-10.8497		14.06	-1.25164	-1.06854	83.12	-19.8947	-19.7116		32.14	-32.0276	-1.8111	82.77	-26.128	4.0885
37.91	-20.533	-1.8824	82.14	-30.3379	-11.6873		38.12	-2.24051	-0.761	81.88	-15.6791	-14.1996		38.01	-20.1902	-0.4388	81.68	-19.7833	-0.0319		38.04	4.85372	-0.74379	81.88	-5.04843	-10.6459		14.96	-1.62347	-1.44037	81.97	-19.78	-19.5969		33.23	-33.5328	-3.3163	81.9	-26.8398	3.3767
39.17	-19.4646	-0.814	80.82	-28.2483	-9.5977		38.96	-2.28624	-0.80673	81	-15.3986	-13.9191		39.23	-19.6536	0.0978	80.79	-19.6679	0.0835		39.14	4.19352	-1.40399	80.99	-4.66556	-10.2631		15.95	-1.84997	-1.66687	80.98	-19.4029	-19.2198		34.03	-33.2273	-3.0108	81.09	-26.0778	4.1387
40.04	-21.5713	-2.9207	79.96	-27.7826	-9.132		39.96	-2.66856	-1.18905	79.88	-15.0288	-13.5493		39.93	-19.3313	0.4201	80.01	-20.7588	-1.0074		40.22	3.92819	-1.66932	80.07	-3.68464	-9.28215		17.24	-1.8649	-1.6818	80.09	-19.1039	-18.9208		34.98	-33.0477	-2.8312	80.03	-25.6801	4.5364
41.01	-20.8645	-2.2139	78.92	-28.3678	-9.7172		41.13	-2.49667	-1.01716	78.67	-14.2599	-12.7804		41.02	-19.4551	0.2963	79.14	-20.4302	-0.6788		41	3.82602	-1.77149	78.95	-4.17067	-9.76818		18.11	-1.80867	-1.62557	78.76	-19.4661	-19.283		36.02	-31.6635	-1.447	78.94	-25.4327	4.7838
42.12	-19.8797	-1.2291	77.98	-27.0841	-8.4335		42.12	-2.74498	-1.26547	78.01	-14.1968	-12.7173		42.02	-19.9533	-0.2019	78.28	-20.1105	-0.3591		42.03	4.46219	-1.13532	77.92	-3.46914	-9.06665		19.2	-1.37028	-1.18718	78.05	-19.2604	-19.0773		37.19	-32.7429	-2.5264	77.92	-25.9985	4.218
43	-19.8873	-1.2367	77.04	-27.6067	-8.9561		43.06	-2.52834	-1.04883	76.94	-13.4449	-11.9654		43.12	-19.5611	0.1903	76.86	-19.5546	0.1968		43.16	3.72352	-1.87399	76.83	-3.04797	-8.64548		20.25	-1.48974	-1.30664	76.93	-19.3722	-19.1891		38.06	-32.9041	-2.6876	76.87	-24.0519	6.1646
43.94	-21.3122	-2.6616	75.81	-25.0636	-6.413		44.23	-3.04335	-1.56384	76.01	-12.5067	-11.0272		44.17	-19.9104	-0.159	76.16	-20.5481	-0.7967		44.06	3.59471	-2.0028	75.78	-2.4557	-8.05321		20.95	-1.93802	-1.75492	75.75	-19.0536	-18.8705		39.06	-33.8762	-3.6597	75.72	-26.3099	3.9066
45.08	-21.5476	-2.897	74.89	-25.158	-6.5074		45.14	-3.04019	-1.56068	74.9	-12.4391	-10.9596		45.09	-19.2684	0.483	75.31	-20.2063	-0.4549		44.94	3.28453	-2.31298	74.92	-3.16284	-8.76035		22.14	-1.93276	-1.74966	74.92	-18.9359	-18.7528		40.02	-33.0476	-2.8311	74.98	-25.0672	5.1493
46.16	-21.7791	-3.1285	73.92	-25.2455	-6.5949		46.19	-3.06551	-1.586	73.76	-11.0072	-9.52769		46.15	-19.5278	0.2236	73.9	-19.5281	0.2233		45.98	3.88699	-1.71052	73.85	-2.13314	-7.73065		22.97	-2.00726	-1.82416	73.71	-18.5371	-18.354		41.18	-32.3993	-2.1828	73.93	-25.2874	4.9291
47.13	-20.6159	-1.9653	72.94	-24.971	-6.3204		47.01	-3.46	-1.98049	72.96	-11.2309	-9.75139		46.98	-19.482	0.2694	73.02	-20.0467	-0.2953		46.93	2.9127	-2.68481	73.17	-2.06591	-7.66342		24.17	-2.18072	-1.99762	72.81	-18.5721	-18.389		41.99	-32.7279	-2.5114	72.77	-25.9052	4.3113
48.01	-20.7758	-2.1252	71.87	-24.5137	-5.8631		48.02	-2.85225	-1.37274	71.82	-10.4779	-8.99839		47.94	-19.6385	0.1129	71.92	-19.5389	0.2125		48.03	3.36753	-2.22998	71.8	-1.50764	-7.10515		24.98	-2.4588	-2.2757	72.05	-18.8922	-18.7091		43.17	-32.5476	-2.3311	71.95	-25.0369	5.1796
49.11	-19.4711	-0.8205	70.96	-25.7139	-7.0633		49.12	-3.77815	-2.29864	71.08	-9.72958	-8.25007		49.11	-20.0276	-0.2762	70.85	-19.9394	-0.188		49.1	2.69273	-2.90478	70.8	-0.530214	-6.12772		26.26	-3.02752	-2.84442	70.89	-18.445	-18.2619		43.95	-33.0399	-2.8234	71.02	-26.4698	3.7467
50.06	-19.9702	-1.3196	69.86	-24.5068	-5.8562		50.03	-3.1113	-1.63179	69.97	-8.65349	-7.17398		49.95	-18.8906	0.8608	69.79	-20.3331	-0.5817		49.96	2.93283	-2.66468	70.17	-0.566979	-6.16449		27.2	-3.43986	-3.25676	70.02	-17.7561	-17.573		45.05	-33.4217	-3.2052	69.92	-25.9857	4.2308
51.15	-21.2097	-2.5591	68.99	-24.3291	-5.6785		51.31	-3.83895	-2.35944	68.98	-8.75554	-7.27603		51.07	-20.0221	-0.2707	68.64	-19.6184	0.133		51.02	2.9438	-2.65371	69.24	-0.33488	-5.93239		27.99	-3.04487	-2.86177	68.99	-18.3204	-18.1373		46.08	-33.8023	-3.5858	69.1	-25.8223	4.3942
52.08	-19.8864	-1.2358	67.74	-24.3801	-5.7295		52.1	-3.51428	-2.03477	67.8	-8.42577	-6.94626		51.98	-19.1478	0.6036	67.89	-18.9814	0.77		52.07	2.04564	-3.55187	67.84	0.110755	-5.48675		29.05	-3.19231	-3.00921	68.2	-18.5368	-18.3537		47.08	-32.9087	-2.6922	67.83	-25.0666	5.1499
52.97	-20.2147	-1.5641	66.92	-24.5709	-5.9203		53.09	-3.63537	-2.15586	67.19	-7.75628	-6.27677		53.01	-20.2154	-0.464	66.89	-20.7417	-0.9903		53.08	2.22679	-3.37072	66.95	0.817273	-4.78024		30.15	-3.07644	-2.89334	66.84	-18.2088	-18.0257		47.97	-32.4556	-2.2391	66.86	-25.8048	4.4117
54.11	-20.9652	-2.3146	65.97	-23.6892	-5.0386		53.98	-3.87036	-2.39085	65.97	-7.46905	-5.98954		54.11	-19.6534	0.098	65.72	-19.7756	-0.0242		54.1	1.81559	-3.78192	65.93	0.472986	-5.12452		30.85	-3.97316	-3.79006	66.12	-17.5186	-17.3355		49.01	-32.7692	-2.5527	65.87	-25.9603	4.2562
54.97	-18.9101	-0.2595	65.12	-23.8504	-5.1998		54.92	-3.80096	-2.32145	64.89	-6.89767	-5.41816		55.02	-19.5068	0.2446	65.26	-18.7559	0.9955		55.12	1.05321	-4.5443	64.96	1.04494	-4.55257		32.21	-3.3281	-3.145	64.91	-17.5486	-17.3655		50.13	-33.8127	-3.5962	64.75	-26.0034	4.2131
56.13	-21.6576	-3.007	63.95	-23.2674	-4.6168		56.29	-4.41384	-2.93433	63.9	-7.04155	-5.56204		55.99	-20.1637	-0.4123	63.97	-19.1754	0.576		56.17	0.295558	-5.30195	63.97	1.33897	-4.25854		33.11	-4.41709	-4.23399	64.1	-18.0519	-17.8688		50.96	-32.8061	-2.5896	63.97	-26.1278	4.0887
57.08	-21.5029	-2.8523	62.94	-25.552	-6.9014		57.08	-4.52707	-3.04756	62.78	-6.71178	-5.23227		57.17	-19.4282	0.3232	62.79	-19.0795	0.6719		57.03	1.29707	-4.30044	62.94	1.75635	-3.84116		34.13	-5.09487	-4.91177	63.26	-17.4681	-17.285		52.1	-33.42	-3.2035	63.01	-27.7783	2.4382
58.08	-20.5106	-1.86	61.87	-22.9823	-4.3317		57.99	-4.55035	-3.07084	61.9	-6.49703	-5.01752		57.96	-19.4443	0.3071	61.97	-19.569	0.1824		58.1	-0.344585	-5.9421	61.88	1.87302	-3.72449		35.05	-4.80571	-4.62261	61.87	-17.288	-17.1049		52.95	-33.2375	-3.021	61.88	-26.8318	3.3847
59.14	-20.3342	-1.6836	61.07	-23.6336	-4.983		59.2	-4.48347	-3.00396	61.03	-6.67274	-5.19323		59.17	-20.0665	-0.3151	61.04	-18.5967	1.1547		59.03	-0.74294	-6.34045	60.75	2.16748	-3.43003		36.12	-5.70525	-5.52215	61.11	-16.8142	-16.6311		54.19	-33.3635	-3.147	60.95	-26.1415	4.075
59.96	-19.9169	-1.2663	59.98	-24.837	-6.1864		60.05	-4.94267	-3.46316	59.92	-6.37614	-4.89663		59.96	-19.5896	0.1618	60.11	-20.8624	-1.111		60.15	-1.34135	-6.93886	59.87	3.10701	-2.4905		37.16	-5.94977	-5.76667	60.02	-16.1214	-15.9383		54.99	-33.6283	-3.4118	60.06	-26.8324	3.3841
61.06	-22.3422	-3.6916	58.9	-22.7733	-4.1227		60.91	-4.95174	-3.47223	58.94	-6.0637	-4.58419		60.99	-19.3041	0.4473	58.93	-19.4199	0.3315		60.97	-1.70778	-7.30529	58.91	3.51707	-2.08044		38.07	-5.97885	-5.79575	58.85	-15.9108	-15.7277		55.93	-32.2553	-2.0388	58.97	-26.8107	3.4058
62.09	-20.2565	-1.6059	57.94	-23.0345	-4.3839		62.07	-5.39429	-3.91478	57.98	-5.15375	-3.67424		62.3	-18.9181	0.8333	58	-19.1269	0.6245		62.16	-2.33909	-7.9366	57.86	3.41033	-2.18718		38.87	-6.49469	-6.31159	57.83	-15.639	-15.4559		56.97	-33.1074	-2.8909	57.93	-27.453	2.7635
63.21	-21.0117	-2.3611	57.05	-24.4638	-5.8132		63.26	-5.46704	-3.98753	56.82	-5.20293	-3.72342		63.16	-20.4874	-0.736	56.93	-19.5589	0.1925		63.16	-3.12568	-8.72319	57.01	3.34036	-2.25715		40.17	-7.13004	-6.94694	56.8	-15.2111	-15.028		58.06	-32.8095	-2.593	56.79	-27.7246	2.4919
64.07	-21.3601	-2.7095	56.02	-22.1525	-3.5019		64.17	-5.30585	-3.82634	55.91	-5.25999	-3.78048		64.26	-19.5808	0.1706	55.63	-19.9937	-0.2423		64.14	-3.47678	-9.07429	55.97	3.55136	-2.04615		41.26	-7.67619	-7.49309	56.01	-15.0894	-14.9063		58.99	-31.9389	-1.7224	55.81	-28.6808	1.5357
65.04	-21.1801	-2.5295	54.94	-23.8129	-5.1623		64.96	-5.67099	-4.19148	55.15	-4.91335	-3.43384		64.97	-19.5228	0.2286	54.88	-19.0759	0.6755		65	-3.82336	-9.42087	54.86	3.87583	-1.72168		42.08	-8.07742	-7.89432	55.08	-14.8587	-14.6756		60.06	-32.8802	-2.6637	55.11	-28.8239	1.3926
66.09	-20.9223	-2.2717	54.07	-22.4109	-3.7603		66.23	-6.05429	-4.57478	54.02	-4.56335	-3.08384		66.1	-18.692	1.0594	54.01	-19.1736	0.5778		66.12	-3.88866	-9.48617	53.91	4.70323	-0.89428		43.21	-9.32543	-9.14233	54.16	-14.7475	-14.5644		61.03	-32.8861	-2.6696	53.91	-28.6165	1.6
67.32	-21.2321	-2.5815	53	-22.8279	-4.1773		67.01	-6.85611	-5.3766	52.96	-4.63289	-3.15338		67.25	-19.4274	0.324	52.85	-19.6747	0.0767		67.19	-4.44839	-10.0459	53.08	4.47459	-1.12292		44.05	-8.97936	-8.79626	52.82	-13.1275	-12.9444		62.22	-31.5887	-1.3722	52.77	-28.5859	1.6306
68.76	-21.2862	-2.6356	51.95	-23.1203	-4.4697		68.04	-7.01801	-5.5385	51.99	-4.56445	-3.08494		68.5	-18.8749	0.8765	51.85	-19.6949	0.0565		68.1	-5.37232	-10.9698	51.82	4.61724	-0.98027		45.01	-9.87453	-9.69143	52.09	-13.1604	-12.9773		62.92	-31.8248	-1.6083	51.88	-28.5207	1.6958
69.19	-20.4191	-1.7685	50.92	-23.1066	-4.456		69.33	-7.66157	-6.18206	50.84	-4.37283	-2.89332		69	-18.4652	1.2862	50.85	-19.2072	0.5442		69.06	-6.18667	-11.7842	50.71	4.93198	-0.66553		46.16	-10.0826	-9.8995	50.86	-12.7219	-12.5388		63.98	-30.3948	-0.1783	50.87	-28.0492	2.1673
70.03	-21.9083	-3.2577	49.94	-21.6314	-2.9808		70.13	-7.92285	-6.44334	49.86	-4.30826	-2.82875		69.88	-19.8371	-0.0857	50.08	-20.2238	-0.4724		69.95	-6.33989	-11.9374	49.91	5.29547	-0.30204		47.15	-10.4976	-10.3145	50.07	-12.7243	-12.5412		65.15	-31.0342	-0.8177	49.8	-28.1343	2.0822
71.41	-21.5933	-2.9427	49.27	-22.7532	-4.1026		71.1	-8.50192	-7.02241	49.02	-4.20013	-2.72062		71.04	-19.9535	-0.2021	48.81	-20.1147	-0.3633		71.16	-6.85206	-12.4496	48.97	5.52488	-0.07263		48.1	-11.7214	-11.5383	48.94	-12.0346	-11.8515		66.05	-30.7403	-0.5238	48.79	-29.4816	0.7349
71.91	-22.1948	-3.5442	48.01	-22.4385	-3.7879		71.8	-9.11008	-7.63057	47.7	-3.54769	-2.06818		72	-18.2686	1.4828	48.01	-19.3046	0.4468		71.94	-7.39696	-12.9945	47.86	5.48699	-0.11052		49.11	-11.7859	-11.6028	48.17	-11.1093	-10.9262		67.12	-30.1641	0.0524	48.07	-28.9043	1.3122
72.71	-22.0937	-3.4431	46.93	-23.0203	-4.3697		72.97	-9.81912	-8.33961	46.97	-3.93998	-2.46047		73.22	-18.435	1.3164	46.84	-19.7005	0.0509		73.04	-7.98217	-13.5797	46.85	5.65865	0.06114		50.05	-12.5086	-12.3255	47.03	-10.9049	-10.7218		68.08	-31.1502	-0.9337	47	-27.2184	2.9981
74.02	-21.2734	-2.6228	45.87	-22.4768	-3.8262		74.15	-10.5101	-9.03059	46.06	-3.35384	-1.87433		74.27	-18.2394	1.512	46.12	-19.8267	-0.0753		74.11	-7.87306	-13.4706	45.94	5.31747	-0.28004		51.08	-12.7239	-12.5408	45.98	-10.2127	-10.0296		69.21	-29.9093	0.3072	45.94	-28.7195	1.497
75.15	-22.8149	-4.1643	44.86	-22.0632	-3.4126		75.24	-11.3299	-9.85039	44.69	-3.63127	-2.15176		74.92	-19.2435	0.5079	44.81	-21.0022	-1.2508		75.16	-8.74079	-14.3383	44.94	5.51877	-0.07874		52	-13.3363	-13.1532	44.85	-9.21859	-9.03549		70.16	-29.3756	0.8409	44.98	-29.2635	0.953
76.2	-22.897	-4.2464	44.1	-22.9257	-4.2751		75.92	-11.6161	-10.1366	43.84	-3.57191	-2.0924		75.94	-19.075	0.6764	43.92	-19.6855	0.0659		76.07	-8.40403	-14.0015	43.81	5.98214	0.38463		53.15	-14.1501	-13.967	43.92	-9.06852	-8.88542		70.93	-29.0199	1.1966	44.03	-28.9986	1.2179
77.25	-24.082	-5.4314	43.04	-21.1689	-2.5183		77.26	-12.9342	-11.4547	42.99	-3.57001	-2.0905		76.9	-18.6903	1.0611	43.24	-20.8125	-1.0611		76.99	-7.8889	-13.4864	42.74	5.9226	0.32509		54.13	-14.3635	-14.1804	42.79	-8.73368	-8.55058		72.17	-28.5713	1.6452	42.9	-27.4202	2.7963
77.9	-24.797	-6.1464	41.85	-22.9113	-4.2607		77.94	-13.2466	-11.7671	41.94	-3.82356	-2.34405		77.74	-18.5201	1.2313	41.93	-20.1264	-0.375		77.93	-8.17791	-13.7754	42.05	5.72089	0.12338		55.08	-14.3686	-14.1855	41.96	-8.24622	-8.06312		73.13	-28.7086	1.5079	42.06	-27.8719	2.3446
79.89	-24.8088	-6.1582	41.05	-22.1038	-3.4532		79.04	-13.8901	-12.4106	40.84	-3.30607	-1.82656		79.16	-18.6908	1.0606	41.85	-20.5985	-0.8471		79.17	-8.8548	-14.4523	41.13	5.96853	0.37102		56.19	-15.5583	-15.3752	41.03	-7.81694	-7.63384		73.95	-28.7443	1.4722	40.8	-28.525	1.6915
80.44	-25.2471	-6.5965	39.71	-23.3762	-4.7256		80.33	-14.5925	-13.113	39.91	-3.64889	-2.16938		80.22	-19.8694	-0.118	39.61	-19.6962	0.0552		80.1	-8.85361	-14.4511	39.69	5.80259	0.20508		57.05	-15.9351	-15.752	39.82	-6.68125	-6.49815		74.99	-28.084	2.1325	39.94	-28.0622	2.1543
81.28	-25.7965	-7.1459	38.75	-21.4521	-2.8015		81.02	-15.0466	-13.5671	38.94	-2.68055	-1.20104		81.11	-19.781	-0.0296	39.03	-19.9391	-0.1877		80.9	-9.18333	-14.7808	38.64	5.78852	0.19101		58.11	-15.822	-15.6389	39	-6.5755	-6.3924		76.06	-28.208	2.0085	39.06	-28.1063	2.1102
82	-27.0851	-8.4345	37.9	-23.7304	-5.0798		81.99	-15.7451	-14.2656	37.98	-2.94322	-1.46371		81.88	-19.9086	-0.1572	38.09	-19.8383	-0.0869		82.05	-9.05414	-14.6517	37.86	6.19639	0.59888		58.92	-16.6013	-16.4182	37.86	-6.12045	-5.93735		77.1	-27.353	2.8635	37.98	-28.7434	1.4731
83.53	-28.2471	-9.5965	36.74	-22.062	-3.4114		83.03	-15.7853	-14.3058	36.66	-3.01864	-1.53913		83.38	-18.7783	0.9731	37.1	-19.9813	-0.2299		83.48	-8.63422	-14.2317	36.86	5.71372	0.11621		59.98	-15.9662	-15.7831	36.9	-6.00097	-5.81787		78.16	-28.07	2.1465	37.09	-28.8121	1.4044
84.44	-29.2067	-10.5561	36.03	-23.4839	-4.8333		84.07	-16.5724	-15.0929	35.89	-2.65754	-1.17803		83.79	-18.79	0.9614	35.94	-20.0871	-0.3357		83.55	-9.04092	-14.6384	36.1	5.73532	0.13781		61.17	-16.961	-16.7779	35.95	-5.26668	-5.08358		78.87	-28.188	2.0285	35.82	-28.6118	1.6047
84.88	-29.5111	-10.8605	34.66	-22.5381	-3.8875		84.95	-16.6361	-15.1566	34.71	-2.7381	-1.25859		85.55	-18.7932	0.9582	35.14	-20.3929	-0.6415		85.09	-8.90948	-14.507	34.95	6.16548	0.56797		62.03	-16.4948	-16.3117	34.91	-6.45244	-6.26934		80.1	-28.7919	1.4246	34.9	-28.7625	1.454
85.91	-31.633	-12.9824	33.73	-22.4568	-3.8062		85.96	-17.3775	-15.898	33.96	-2.95533	-1.47582		86.26	-19.2015	0.5499	33.98	-20.2079	-0.4565		86.38	-9.04069	-14.6382	33.64	6.28894	0.69143		63.08	-17.1933	-17.0102	33.89	-4.90726	-4.72416		81.21	-27.4753	2.7412	33.83	-28.0672	2.1493
86.79	-31.2241	-12.5735	32.87	-23.0723	-4.4217		86.88	-17.0729	-15.5934	32.82	-2.62726	-1.14775		87.12	-19.5701	0.1813	32.48	-20.0141	-0.2627		87.43	-8.76395	-14.3615	33.04	6.60019	1.00268		64.16	-17.4331	-17.25	32.92	-4.4309	-4.2478		82.18	-26.7653	3.4512	32.84	-27.9563	2.2602
88.22	-33.2062	-14.5556	31.69	-22.3436	-3.693		88.04	-18.1474	-16.6679	31.85	-2.35949	-0.87998		88.4	-19.4557	0.2957	31.73	-20.7055	-0.9541		87.72	-8.59344	-14.191	32.03	6.49847	0.90096		65.25	-17.4808	-17.2977	31.97	-4.74823	-4.56513		83.15	-28.2148	2.0017	31.98	-28.8897	1.3268
88.97	-34.1552	-15.5046	30.86	-21.6696	-3.019		89.43	-18.6278	-17.1483	30.83	-2.45726	-0.97775		89.08	-19.7138	0.0376	30.77	-20.6538	-0.9024		89.26	-8.56072	-14.1582	30.63	6.91425	1.31674		65.93	-17.6796	-17.4965	31.05	-4.44365	-4.26055		84.03	-28.9422	1.2743	31.16	-29.0609	1.1556
90.01	-36.6758	-18.0252	30.02	-21.4566	-2.806		90.27	-17.8382	-16.3587	30.04	-2.10439	-0.62488		89.83	-19.2441	0.5073	29.93	-20.6959	-0.9445		89.79	-8.74239	-14.3399	30.01	6.24626	0.64875		67.18	-17.5867	-17.4036	29.92	-4.43592	-4.25282		85.14	-27.5632	2.6533	30	-27.7482	2.4683
91.05	-35.1902	-16.5396	28.86	-22.3027	-3.6521		90.8	-18.4995	-17.02	29.06	-2.01453	-0.53502		90.86	-19.3913	0.3601	28.9	-21.318	-1.5666		90.87	-8.63776	-14.2353	29.12	6.02757	0.43006		68.08	-17.9804	-17.7973	28.98	-4.15677	-3.97367		85.94	-28.047	2.1695	28.85	-27.3703	2.8462
92	-37.891	-19.2404	27.94	-21.4959	-2.8453		91.95	-18.3629	-16.8834	27.97	-2.22695	-0.74744		92.41	-20.3976	-0.6462	28.21	-21.1014	-1.35		91.95	-8.50155	-14.0991	27.64	6.9932	1.39569		69.03	-17.6307	-17.4476	28.18	-4.38175	-4.19865		86.72	-28.4415	1.775	27.88	-27.7033	2.5132
93.64	-39.8903	-21.2397	26.9	-22.9037	-4.2531		93.5	-19.2888	-17.8093	26.95	-1.74995	-0.27044		92.91	-20.7092	-0.9578	27.17	-20.7115	-0.9601		93.32	-8.24426	-13.8418	27.36	6.97572	1.37821		70.1	-17.6952	-17.5121	26.91	-3.62435	-3.44125		88.27	-28.3923	1.8242	27	-28.5118	1.7047
94.26	-38.7188	-20.0682	25.99	-22.6277	-3.9771		94.04	-18.4244	-16.9449	25.93	-1.65664	-0.17713		94.19	-19.6719	0.0795	26.29	-19.8841	-0.1327		94.22	-9.26099	-14.8585	25.92	6.70056	1.10305		71.28	-17.3259	-17.1428	25.94	-3.87772	-3.69462		89.03	-27.7054	2.5111	25.97	-27.0905	3.126
94.79	-38.7547	-20.1041	24.98	-22.1444	-3.4938		94.99	-18.9617	-17.4822	24.93	-1.13342	0.34609		94.85	-20.2783	-0.5269	24.75	-21.0672	-1.3158		95.01	-8.46661	-14.0641	24.91	6.90218	1.30467		71.89	-17.4401	-17.257	24.98	-3.88569	-3.70259		90.09	-27.9269	2.2896	25	-27.661	2.5555
																												72.99	-17.7368	-17.5537	23.94	-4.0076	-3.8245		91.14	-27.8155	2.401	23.76	-26.7112	3.5053
																												74.09	-17.8016	-17.6185	23.13	-3.35754	-3.17444		92.38	-28.3319	1.8846	22.83	-27.8014	2.4151
																												75.12	-17.3275	-17.1444	21.96	-3.60113	-3.41803		93.3	-27.6664	2.5501	21.73	-26.6814	3.5351
																												75.99	-18.2674	-18.0843	20.87	-3.12851	-2.94541		93.96	-28.2592	1.9573	20.88	-26.7201	3.4964
																												77.17	-18.2279	-18.0448	19.97	-3.32057	-3.13747		95.04	-26.8893	3.3272	19.86	-27.2429	2.9736
																												78.08	-17.6733	-17.4902	19.09	-2.29055	-2.10745
																												79.09	-18.0557	-17.8726	17.98	-3.04978	-2.86668
																												80	-18.69	-18.5069	16.99	-2.51311	-2.33001
																												81.22	-18.333	-18.1499	15.89	-2.66597	-2.48287
																												81.89	-18.4602	-18.2771	14.78	-2.35603	-2.17293
																												83.09	-18.4015	-18.2184	14.03	-2.39592	-2.21282
																												84.26	-18.3497	-18.1666	13.05	-2.06079	-1.87769
																												85.44	-18.6662	-18.4831	11.96	-2.19383	-2.01073
																												86.18	-18.9817	-18.7986	10.85	-1.64678	-1.46368
																												87.21	-18.7691	-18.586	9.82	-1.57564	-1.39254
																												88.45	-19.4019	-19.2188	8.93	-1.98517	-1.80207
																												89.52	-19.4153	-19.2322	7.83	-1.60195	-1.41885
																												89.94	-19.6167	-19.4336	6.98	-1.36596	-1.18286
																												91.34	-19.1686	-18.9855	6.05	-1.3181	-1.135
																												92.31	-18.9115	-18.7284	4.93	-1.33719	-1.15409
																												93.38	-19.683	-19.4999	3.72	-0.555771	-0.372669
																												94.08	-20.1436	-19.9605	2.81	-0.443338	-0.260236
																												94.94	-20.1089	-19.9258	1.95	-1.1435	-0.960398
														MjSpt5-KOW, pH 4							hSpt5-KOW5, pH 4							EcRfaH-KOW, pH 4
														Heating			Cooling				Heating			Cooling				Heating			Cooling
														Wavelength	222	nm					Wavelength	225	nm					Wavelength	230	nm
														[Protein]	0.015	mM					[Protein]	0.015	mM					[Protein]	0.015	mM
														Temperature (°C)	CD (mdeg)	DCD (mdeg)	Temperature (°C)	CD (mdeg)	DCD (mdeg)		Temperature (°C)	CD (mdeg)	DCD (mdeg)	Temperature (°C)	CD (mdeg)	DCD (mdeg)		Temperature (°C)	CD (mdeg)	DCD (mdeg)		N/A, Aggregation
														24.99	-20.5721	0	95.06	-23.1033	-2.5312		19.97	5.39895	0	94.81	-27.7136	-33.1125		2.11	-14.4653	0
														26.08	-21.1275	-0.5554	93.92	-22.8155	-2.2434		21.19	5.18026	-0.21869	94.08	-27.1999	-32.5988		3.37	-15.1759	-0.7106
														27.05	-20.25	0.3221	93.07	-23.603	-3.0309		22.12	4.81848	-0.58047	92.78	-28.1013	-33.5003		4.01	-15.0375	-0.5722
														27.96	-20.4443	0.1278	91.58	-22.7459	-2.1738		23	4.10082	-1.29813	91.86	-27.0587	-32.4577		5.12	-14.9198	-0.4545
														28.91	-21.2092	-0.6371	90.95	-22.1579	-1.5858		24.22	4.10586	-1.29309	90.57	-26.8459	-32.2448		6.03	-14.572	-0.1067
														30.13	-20.648	-0.0759	89.96	-23.2537	-2.6816		25.14	4.37	-1.02895	89.61	-27.2657	-32.6647		6.96	-15.05	-0.5847
														31.14	-20.9779	-0.4058	89.07	-22.301	-1.7289		26.04	3.49067	-1.90828	88.88	-28.1808	-33.5797		8.14	-14.8446	-0.3793
														32.15	-21.835	-1.2629	87.91	-22.7484	-2.1763		27.03	2.96578	-2.43317	87.92	-26.5065	-31.9054		9.09	-15.5868	-1.1215
														32.96	-22.0946	-1.5225	86.95	-24.6749	-4.1028		28.1	3.66399	-1.73496	87.12	-26.8162	-32.2152		10.02	-15.3442	-0.8789
														34.17	-21.8389	-1.2668	85.99	-23.4258	-2.8537		29.08	3.09998	-2.29897	85.91	-26.7237	-32.1227		10.98	-15.8611	-1.3958
														34.97	-20.9248	-0.3527	84.69	-22.888	-2.3159		30.12	1.79286	-3.60609	84.8	-26.5194	-31.9184		12.01	-15.3575	-0.8922
														36.07	-21.8274	-1.2553	83.82	-23.63	-3.0579		31.25	1.82766	-3.57129	83.92	-25.9804	-31.3793		13	-15.0266	-0.5613
														37.05	-21.8122	-1.2401	82.9	-22.9091	-2.337		32.19	2.86855	-2.5304	82.96	-25.6795	-31.0785		13.89	-15.5408	-1.0755
														38.17	-21.7423	-1.1702	82.65	-23.1772	-2.6051		32.9	2.66341	-2.73554	81.87	-26.5493	-31.9483		15.15	-16.1858	-1.7205
														39.14	-21.6999	-1.1278	80.86	-23.035	-2.4629		33.9	1.56998	-3.82897	81.13	-25.5758	-30.9748		16.2	-16.4394	-1.9741
														40.08	-22.4039	-1.8318	79.73	-23.625	-3.0529		35.08	1.31232	-4.08663	79.92	-24.9426	-30.3416		16.88	-16.766	-2.3007
														41.13	-21.8834	-1.3113	78.62	-23.5096	-2.9375		35.9	1.886	-3.51295	78.92	-24.3292	-29.7281		18.06	-16.5535	-2.0882
														41.93	-21.4877	-0.9156	77.95	-23.8274	-3.2553		37.18	2.01399	-3.38496	78.12	-24.6553	-30.0542		19.13	-16.3222	-1.8569
														43.01	-21.3348	-0.7627	77.04	-22.2292	-1.6571		38.05	0.916607	-4.48234	77.12	-24.8542	-30.2532		20.23	-17.6366	-3.1713
														44.09	-20.4528	0.1193	76.08	-22.7928	-2.2207		39.04	0.828941	-4.57001	75.95	-24.1005	-29.4994		21.16	-16.873	-2.4077
														45.14	-21.8364	-1.2643	74.96	-23.1204	-2.5483		40.1	-0.00594288	-5.40489	74.86	-23.4788	-28.8777		22.23	-17.7516	-3.2863
														46.07	-21.4616	-0.8895	73.71	-22.9678	-2.3957		41.09	0.137079	-5.26187	73.94	-22.8253	-28.2243		23.17	-17.6563	-3.191
														47.21	-21.8211	-1.249	72.72	-23.1426	-2.5705		42.11	-0.520145	-5.9191	72.83	-22.9307	-28.3297		24.17	-18.2844	-3.8191
														48	-20.9487	-0.3766	71.74	-21.1363	-0.5642		43.11	-0.579246	-5.9782	72.09	-22.2713	-27.6702		24.82	-17.8674	-3.4021
														49.07	-21.5937	-1.0216	70.87	-21.8605	-1.2884		44.04	-1.30385	-6.7028	70.82	-21.3101	-26.7091		25.84	-18.7506	-4.2853
														50.15	-20.8945	-0.3224	70.15	-22.5034	-1.9313		44.91	-1.19959	-6.59854	69.81	-20.4856	-25.8846		27.32	-19.5083	-5.043
														51.16	-20.9217	-0.3496	68.88	-20.9486	-0.3765		46	-1.66047	-7.05942	68.82	-19.8395	-25.2385		27.95	-20.5925	-6.1272
														52.02	-21.5301	-0.958	67.9	-22.2491	-1.677		47.04	-2.33337	-7.73232	67.88	-19.2776	-24.6765		29.23	-20.9452	-6.4799
														53.15	-20.8415	-0.2694	67.13	-21.7676	-1.1955		47.99	-2.22087	-7.61982	66.8	-19.2739	-24.6729		30.24	-21.6425	-7.1772
														54.08	-21.3441	-0.772	66.05	-22.0135	-1.4414		49.07	-2.8404	-8.23935	66.11	-19.0546	-24.4535		31.11	-22.7109	-8.2456
														55.08	-20.5816	-0.0095	65.09	-21.7984	-1.2263		50.02	-5.03269	-10.4316	65.06	-17.9381	-23.3371		31.99	-23.4421	-8.9768
														56.15	-21.6812	-1.1091	63.97	-20.9836	-0.4115		50.95	-4.75047	-10.1494	63.87	-16.8855	-22.2844		33.04	-23.7981	-9.3328
														57.21	-21.143	-0.5709	63.13	-22.6642	-2.0921		52.15	-5.23126	-10.6302	62.96	-16.8097	-22.2086		34	-24.9582	-10.4929
														58.1	-21.5906	-1.0185	62.1	-22.1284	-1.5563		53.12	-5.91397	-11.3129	61.96	-15.656	-21.055		34.96	-25.5273	-11.062
														59.19	-21.0703	-0.4982	61.01	-22.1998	-1.6277		54.21	-6.38702	-11.786	60.93	-14.9608	-20.3597		36.02	-26.7101	-12.2448
														60.13	-21.3548	-0.7827	59.98	-21.9831	-1.411		55.03	-7.47578	-12.8747	59.98	-14.2408	-19.6397		37.45	-28.1129	-13.6476
														60.91	-20.8035	-0.2314	58.93	-22.0959	-1.5238		56.12	-9.16087	-14.5598	58.89	-12.767	-18.1659		37.92	-28.3924	-13.9271
														61.99	-20.659	-0.0869	57.99	-21.474	-0.9019		57.14	-9.16877	-14.5677	57.82	-12.265	-17.6639		38.94	-28.3483	-13.883
														63.14	-21.0903	-0.5182	57.08	-21.853	-1.2809		58.06	-10.8063	-16.2052	57	-11.5193	-16.9183		40.15	-30.7158	-16.2505
														63.93	-20.5316	0.0405	55.73	-22.6003	-2.0282		59.19	-10.9225	-16.3214	55.84	-11.0444	-16.4433		41.2	-31.4495	-16.9842
														65.19	-20.5145	0.0576	55.02	-22.2673	-1.6952		60.17	-12.6154	-18.0144	54.77	-9.87357	-15.2725		42.14	-31.9854	-17.5201
														66.06	-20.1857	0.3864	53.73	-20.9552	-0.3831		60.99	-13.8027	-19.2017	53.92	-9.00234	-14.4013		42.95	-32.3686	-17.9033
														66.99	-20.7247	-0.1526	53	-21.7875	-1.2154		61.96	-13.7113	-19.1103	52.84	-8.39523	-13.7942		44.54	-33.4825	-19.0172
														68.24	-19.9187	0.6534	51.86	-22.8606	-2.2885		63.02	-14.3807	-19.7797	51.73	-7.69017	-13.0891		45.21	-33.1784	-18.7131
														69.14	-20.2099	0.3622	51.04	-20.9121	-0.34		64.18	-15.3241	-20.7231	50.83	-7.48979	-12.8887		45.9	-33.9128	-19.4475
														69.89	-20.3493	0.2228	50.01	-20.957	-0.3849		65.07	-17.0163	-22.4153	49.95	-7.0171	-12.4161		46.95	-33.8641	-19.3988
														71.07	-20.1983	0.3738	48.95	-22.3483	-1.7762		66.07	-17.9	-23.299	49.06	-5.53808	-10.937		48.37	-34.0427	-19.5774
														72.14	-20.7602	-0.1881	47.96	-22.1184	-1.5463		67.04	-17.7609	-23.1598	47.84	-4.18241	-9.58136		49.22	-33.4295	-18.9642
														72.99	-20.0321	0.54	46.91	-21.3627	-0.7906		67.87	-17.4249	-22.8239	46.94	-4.24881	-9.64776		49.96	-34.1329	-19.6676
														73.93	-20.8784	-0.3063	45.86	-21.763	-1.1909		69.09	-19.1769	-24.5758	46	-4.29995	-9.6989		50.7	-34.0556	-19.5903
														75.63	-19.5086	1.0635	44.95	-21.8871	-1.315		70.16	-19.407	-24.8059	44.87	-3.94557	-9.34452		52.09	-32.9636	-18.4983
														75.91	-20.4069	0.1652	43.93	-20.7242	-0.1521		71.15	-19.7206	-25.1196	43.91	-3.66935	-9.0683		52.75	-32.8188	-18.3535
														76.96	-19.3048	1.2673	42.85	-21.8622	-1.2901		72.31	-21.4938	-26.8927	43.02	-3.01419	-8.41314		53.97	-31.876	-17.4107
														78.21	-20.2329	0.3392	41.95	-20.9661	-0.394		72.92	-20.9362	-26.3351	41.95	-2.288	-7.68695		55.12	-32.0526	-17.5873
														79.01	-20.618	-0.0459	41.05	-22.3103	-1.7382		74.03	-21.6108	-27.0098	40.95	-2.24543	-7.64438		56.17	-31.83	-17.3647
														80.23	-20.3873	0.1848	39.86	-22.1606	-1.5885		75.2	-22.4746	-27.8736	40	-1.36878	-6.76773		56.82	-30.7199	-16.2546
														80.56	-21.6708	-1.0987	38.87	-22.0132	-1.4411		75.97	-23.1865	-28.5855	39.1	-0.688218	-6.08717		58.36	-30.8028	-16.3375
														82.29	-21.2038	-0.6317	37.93	-22.4975	-1.9254		76.83	-23.4176	-28.8165	37.92	-0.822776	-6.22173		58.95	-31.4888	-17.0235
														83.03	-20.8082	-0.2361	36.97	-21.9025	-1.3304		77.72	-24.3961	-29.795	36.91	-0.973345	-6.3723		60.13	-30.5091	-16.0438
														84.08	-21.4062	-0.8341	35.57	-22.6186	-2.0465		79.13	-24.5363	-29.9352	36.01	-0.606039	-6.00499		61.14	-31.1232	-16.6579
														85.1	-21.6938	-1.1217	35.01	-22.6538	-2.0817		80.19	-24.6867	-30.0857	34.89	-0.808941	-6.20789		61.94	-31.4163	-16.951
														86.06	-21.1629	-0.5908	34.14	-21.8984	-1.3263		80.72	-24.3565	-29.7554	33.97	-0.202744	-5.60169		63.31	-30.4777	-16.0124
														87.23	-21.2528	-0.6807	32.99	-22.7972	-2.2251		82.46	-25.9711	-31.37	32.99	0.142622	-5.25633		64.09	-30.5164	-16.0511
														88.07	-21.2212	-0.6491	31.91	-22.3271	-1.755		83.65	-24.7152	-30.1141	31.92	0.537362	-4.86159		65.12	-30.3166	-15.8513
														88.6	-21.1198	-0.5477	30.9	-23.014	-2.4419		83.9	-24.4871	-29.8861	31.02	0.765482	-4.63347		66.19	-32.3193	-17.854
														89.91	-22.0834	-1.5113	29.85	-22.0309	-1.4588		85.01	-25.8365	-31.2355	29.99	0.587901	-4.81105		67.02	-31.6602	-17.1949
														90.63	-21.514	-0.9419	29	-22.2681	-1.696		85.83	-26.1372	-31.5361	28.9	0.990228	-4.40872		68.14	-32.1946	-17.7293
														92.2	-22.2176	-1.6455	27.81	-23.7369	-3.1648		86.68	-25.4734	-30.8724	27.75	1.48596	-3.91299		69.12	-32.303	-17.8377
														93.15	-22.2235	-1.6514	26.97	-22.3237	-1.7516		87.53	-26.0783	-31.4773	27	0.653533	-4.74542		70.14	-32.0225	-17.5572
														93.9	-22.2974	-1.7253	25.8	-22.64	-2.0679		88.74	-25.7091	-31.108	25.99	1.27308	-4.12587		70.92	-32.3061	-17.8408
														94.98	-23.1686	-2.5965	24.69	-23.6763	-3.1042		89.85	-26.3177	-31.7167	24.92	1.38675	-4.0122		72.22	-32.4214	-17.9561
																					91	-26.9674	-32.3663	23.8	0.720117	-4.67883		72.91	-32.4778	-18.0125
																					91.64	-26.2463	-31.6453	22.82	1.90037	-3.49858		74.21	-32.9932	-18.5279
																					92.79	-28.1531	-33.5521	21.89	2.11284	-3.28611		75.11	-32.7226	-18.2573
																					94.01	-27.6258	-33.0247	20.88	1.11677	-4.28218		75.95	-32.6312	-18.1659
																					94.92	-27.5163	-32.9153	19.94	1.25139	-4.14756		77.02	-33.5446	-19.0793
																												78.09	-33.5801	-19.1148
																												78.89	-34.5162	-20.0509
																												80.11	-33.8603	-19.395
																												80.84	-34.3403	-19.875
																												82.11	-34.0667	-19.6014
																												82.99	-33.0344	-18.5691
																												84	-32.8633	-18.398
																												85.25	-35.9343	-21.469
																												86.18	-36.333	-21.8677
																												87.31	-34.679	-20.2137
																												88.4	-38.8086	-24.3433
																												88.88	-40.2424	-25.7771
																												89.88	-37.0395	-22.5742
																												91.16	-37.606	-23.1407
																												92.25	-35.4624	-20.9971
																												92.79	-30.9169	-16.4516
																												94.05	-29.0674	-14.6021
																												95.5	-35.3653	-20.9

## Sheet: DSC-based thermal denaturation
EcNusG-KOW, pH 7			MtNusG-KOW, pH 7			MjSpt5-KOW, pH 7			hSpt5-KOW5, pH 4			EcRfaH-KOW, pH 7			VcRfaH-KOW, pH 7
Temperature (°C)	Heat capacity (J*K/mol)		Temperature (°C)	Heat capacity (J*K/mol)		Temperature (°C)	Heat capacity (J*K/mol)		Temperature (°C)	Heat capacity (J*K/mol)		Temperature (°C)	Heat capacity (J*K/mol)		Temperature (°C)	Heat capacity (J*K/mol)
6.0002	-12183.7		-11944.4	-239.301		10.2677	-7994.64		6.03451	-12266.1		10.2031	-11941.8		5.98854	-9242.28
6.49742	-12123.6		-11911.5	-212.103		10.7656	-8002.2		6.53104	-11960.5		10.7037	-11865.3		6.48729	-8779.68
6.99444	-12073.9		-11878.6	-195.344		11.262	-8004.48		7.03039	-12085		11.1976	-11767.6		6.98501	-9126.02
7.49246	-12038.3		-11845.6	-192.683		11.7574	-7972.17		7.5284	-11992.6		11.6946	-11721.9		7.48335	-8789.29
7.99022	-11965		-11812.6	-152.367		12.2548	-7919.36		8.02696	-12052.7		12.1957	-11637.3		7.9839	-8840.73
8.49012	-11946.8		-11779.5	-167.328		12.7562	-7837.64		8.52678	-11953.8		12.6955	-11595.5		8.48149	-8948.67
8.99278	-11887.5		-11746.2	-141.301		13.258	-7872		9.02378	-11850.1		13.1931	-11535.1		8.9779	-8819.16
9.48844	-11832.9		-11713.4	-119.53		13.7552	-7853.72		9.52237	-11926.9		13.6867	-11420.4		9.47596	-8636.04
9.9842	-11784.8		-11680.6	-104.193		14.2492	-7791.32		10.0186	-11911.1		14.1793	-11380.4		9.97407	-8292.44
10.4834	-11783.2		-11647.5	-135.73		14.746	-7762.49		10.5207	-12043.8		14.6817	-11326		10.4752	-8345.99
10.9844	-11755.8		-11614.3	-141.533		15.2422	-7769.1		11.0217	-11796		15.1812	-11211.3		10.9728	-8485.83
11.4846	-11613.7		-11581.2	-32.5443		15.7419	-7701.81		11.5154	-12048.6		15.6766	-11173.3		11.4674	-8323.38
11.9808	-11601.2		-11548.3	-52.8309		16.2384	-7652.51		12.011	-11940.5		16.1751	-11226.2		11.9656	-7961.52
12.478	-11552		-11515.4	-36.6477		16.7395	-7667.25		12.5116	-11991.6		16.676	-11263.3		12.462	-8123.16
12.9758	-11512.2		-11482.4	-29.7723		17.2409	-7616.28		13.0125	-11669.5		17.1779	-11052.8		12.9575	-8282.95
13.4694	-11475.2		-11449.7	-25.4868		17.7346	-7639.57		13.507	-11934.4		17.6739	-11001.6		13.454	-7996.21
13.967	-11460.5		-11416.8	-43.7222		18.2407	-7655.49		14.0072	-11906.1		18.1662	-10914.8		13.9565	-7914.01
14.4662	-11448.4		-11383.7	-64.6696		18.7388	-7583.93		14.506	-11868.1		18.6638	-10868.6		14.4569	-7612.03
14.9622	-11340.7		-11350.9	10.1448		19.2348	-7543.93		15.0052	-11755.7		19.1656	-10771.8		14.9538	-7558.3
15.4608	-11352.6		-11317.8	-34.7429		19.7329	-7508.59		15.502	-11770.3		19.6654	-10771.9		15.4469	-7589
15.9622	-11281.4		-11284.6	3.24379		20.2353	-7518.68		15.9948	-11648.3		20.1581	-10660.6		15.9464	-7650.44
16.458	-11275		-11251.8	-23.1906		20.7334	-7514.68		16.4926	-11112		20.6595	-10616.4		16.4454	-8584.9
16.9638	-11191.5		-11218.3	26.7785		21.2253	-7558.29		16.99	-11417		21.1565	-10480.1		16.945	-8213.6
17.4608	-11146.8		-11185.4	38.5165		21.725	-7520.05		17.4876	-11518.2		21.6547	-10458.5		17.4446	-7736.66
17.956	-11165.1		-11152.6	-12.5204		22.2211	-7446.52		17.9856	-11532.6		22.157	-10413.6		17.9402	-7628.33
18.451	-11028.7		-11119.8	91.1198		22.7209	-7357.72		18.4847	-11367.6		22.6516	-10302.7		18.4377	-7496.83
18.9498	-11083		-11086.7	3.7303		23.2197	-7375.68		18.9831	-11407.5		23.1497	-10298.2		18.933	-7394.7
19.4528	-11018.3		-11053.4	35.1425		23.7185	-7355.14		19.4778	-11283.6		23.6514	-10224		19.4306	-7438.79
19.9498	-10974.5		-11020.5	45.9719		24.2136	-7347.98		19.9741	-11344.5		24.1467	-10149.9		19.9327	-7151.09
20.446	-10888.2		-10987.6	99.4521		24.7108	-7373.25		20.4744	-11411.2		24.6416	-10093.2		20.431	-6879.4
20.9444	-10947.8		-10954.6	6.8705		25.2128	-7305.37		20.9784	-11287.3		25.1368	-10018.9		20.9294	-7237.22
21.442	-10880		-10921.7	41.6317		25.7073	-7259.44		21.4816	-11314.6		25.6369	-9933.49		21.4251	-7331.98
21.9354	-10776.2		-10889	112.763		26.2035	-7267.26		21.9764	-11221.3		26.1302	-9842.25		21.9232	-7095.19
22.4366	-10788.8		-10855.8	66.965		26.704	-7273.13		22.4647	-11083.8		26.6247	-9821.2		22.4226	-7098.58
22.9386	-10730.4		-10822.5	92.138		27.2018	-7262.11		22.9595	-11255.6		27.1262	-9752.43		22.9182	-7206.49
23.4338	-10701.4		-10789.7	88.371		27.6968	-7257.07		23.461	-11004.8		27.6304	-9635.71		23.417	-7137.7
23.936	-10669.4		-10756.5	87.118		28.1959	-7205.9		23.9643	-11075.9		28.1265	-9490.87		23.9159	-7080.64
24.4332	-10640		-10723.5	83.5358		28.6948	-7229.22		24.4569	-11035.7		28.6237	-9446.88		24.4118	-6984.25
24.9264	-10601.5		-10690.9	89.3601		29.1894	-7198.73		24.9532	-10965.2		29.1195	-9353.99		24.9074	-7082.96
25.425	-10573.4		-10657.8	84.4082		29.689	-7154.84		25.4503	-10945.5		29.6161	-9229.48		25.407	-7171.17
25.9268	-10539.8		-10624.6	84.8397		30.1844	-7120.88		25.9474	-11092.1		30.1079	-9139.31		25.9042	-6933.37
26.4226	-10519.1		-10591.8	72.6639		30.6853	-7098.06		26.4461	-10946		30.6069	-9052.38		26.4054	-7211.69
26.9216	-10439.7		-10558.7	119.031		31.1795	-7107.32		26.9403	-10843.6		31.1036	-8896.65		26.9033	-6968.06
27.4146	-10447.7		-10526	78.3556		31.6761	-7065.16		27.4375	-10832.5		31.6058	-8834.11		27.3996	-6525.21
27.9102	-10357.7		-10493.2	135.489		32.1763	-7009.58		27.9388	-10740.9		32.1055	-8720.01		27.8936	-6942.92
28.4084	-10331		-10460.2	129.238		32.6751	-7029.86		28.438	-10628.3		32.6013	-8596		28.39	-6733.47
28.9052	-10299.7		-10427.3	127.543		33.1697	-7033.96		28.9357	-10815.3		33.0969	-8429.59		28.8872	-6770.96
29.4038	-10283.3		-10394.3	110.916		33.6737	-6973.04		29.4335	-10645.6		33.5898	-8289.66		29.3857	-6997.16
29.905	-10244.9		-10361	116.171		34.1693	-6978.56		29.9304	-10707.9		34.0894	-8127.23		29.8893	-6933.88
30.4036	-10212.1		-10328	115.898		34.6621	-6950.16		30.4265	-10489		34.5885	-7983.88		30.3899	-6834.95
30.8958	-10156.9		-10295.4	138.517		35.1587	-6928.91		30.9271	-10515.5		35.0853	-7873.32		30.8856	-6760.1
31.3932	-10128.4		-10262.4	133.999		35.6547	-6871.2		31.4225	-10415.6		35.5857	-7694.59		31.381	-6726.99
31.892	-10138.8		-10229.4	90.6145		36.1548	-6880.68		31.9161	-10318.2		36.0857	-7533.11		31.882	-6557.79
32.3894	-10031.4		-10196.4	164.977		36.6506	-6827.6		32.4108	-10225.2		36.5879	-7312.36		32.377	-6427.72
32.8818	-10035.8		-10163.8	127.967		37.1429	-6821.74		32.9092	-10295.8		37.0782	-7132.5		32.8738	-6675.55
33.383	-10006.5		-10130.5	124.015		37.6451	-6850.57		33.4075	-10240.8		37.5708	-6924.01		33.3727	-6548.84
33.8798	-9973.75		-10097.6	123.839		38.1432	-6829.82		33.9043	-10207.5		38.0715	-6776.76		33.8694	-6660.97
34.3792	-9960.34		-10064.5	104.127		38.6384	-6791.2		34.4065	-10238.7		38.567	-6574.43		34.363	-6676.08
34.873	-9932.87		-10031.7	98.8531		39.1338	-6791.49		34.9024	-10183.7		39.0609	-6330.96		34.8638	-6640.2
35.3704	-9892.78		-9998.73	105.951		39.6368	-6773.28		35.4023	-10024.2		39.5619	-6152.73		35.3617	-6643.56
35.8712	-9868.67		-9965.5	96.8337		40.1328	-6767.88		35.9039	-9984.88		40.0593	-5889.57		35.8568	-6960.18
36.3686	-9837.1		-9932.49	95.3868		40.6277	-6753.23		36.3988	-9806.65		40.5583	-5656.38		36.3486	-6570.52
36.8646	-9816.71		-9899.57	82.8586		41.1212	-6656.14		36.8946	-9961.23		41.0493	-5432.83		36.8436	-6192.3
37.3624	-9829.77		-9866.51	36.7432		41.6208	-6713.47		37.3968	-9761.9		41.5461	-5236.14		37.3406	-6213.69
37.8558	-9806.01		-9833.74	27.7302		42.1203	-6714.19		37.8894	-9496.17		42.0455	-5002.66		37.8377	-6412.37
38.3536	-9791.28		-9800.67	9.38448		42.6177	-6667.06		38.3823	-9524.85		42.5427	-4779.82		38.3338	-6439.71
38.8528	-9698.19		-9767.49	69.2942		43.1151	-6648.7		38.878	-9619.25		43.0402	-4498.09		38.8315	-6393.62
39.3512	-9712.15		-9734.34	22.1941		43.6131	-6644.38		39.3766	-9418.18		43.5404	-4291.17		39.3327	-6488.35
39.8498	-9632.15		-9701.17	69.0219		44.1118	-6624.3		39.8745	-9360.37		44.0357	-4019.19		39.8353	-6427.51
40.3476	-9629.43		-9668.03	38.6027		44.6059	-6579.14		40.3756	-9128.41		44.5365	-3733.68		40.3338	-6291.22
40.8422	-9550.2		-9635.09	84.8802		45.1001	-6635.65		40.8732	-9231.58		45.0321	-3548.87		40.8296	-6232.4
41.3386	-9548.79		-9602	53.2066		45.5974	-6613.24		41.3673	-9152.32		45.5296	-3336.2		41.3218	-6254.77
41.838	-9555.21		-9568.68	13.469		46.096	-6588.57		41.8627	-9044.84		46.0284	-3177.66		41.8195	-6339.68
42.3322	-9501.17		-9535.68	34.5105		46.5941	-6551.34		42.3628	-8947.19		46.5234	-2996.7		42.3185	-6104.74
42.8316	-9505.57		-9502.3	-3.2648		47.0929	-6537.3		42.8631	-8741.77		47.0233	-2828.68		42.8164	-6196.1
43.3316	-9504.61		-9468.85	-35.758		47.5885	-6561.26		43.3577	-8634.47		47.5219	-2701.95		43.3143	-6065.44
43.8304	-9412.03		-9435.43	23.4069		48.0891	-6556.16		43.8556	-8442.21		48.0197	-2576.82		43.8108	-6231.8
44.3278	-9407.46		-9402.06	-5.39834		48.5855	-6515.14		44.3557	-8465.49		48.5139	-2481.85		44.3088	-5847.03
44.8216	-9322.94		-9368.88	45.9425		49.0806	-6515.44		44.8543	-8298.39		49.0079	-2425.01		44.807	-5976.3
45.3202	-9282.75		-9335.32	52.5748		49.5763	-6464.23		45.3535	-8123.71		49.51	-2320.01		45.3084	-5731.3
45.8218	-9329.04		-9301.49	-27.5458		50.0769	-6463.71		45.8505	-7988.15		50.0106	-2300.7		45.806	-5591.7
46.3202	-9256.63		-9267.8	11.1705		50.5737	-6429.13		46.3447	-7825.25		50.5089	-2175.71		46.3006	-5870.15
46.8138	-9290.37		-9234.36	-56.0122		51.0708	-6420.38		46.84	-7591.1		51.0021	-2204.02		46.7985	-5598.85
47.3088	-9241.27		-9200.73	-40.544		51.5641	-6369.43		47.3404	-7547.16		51.5011	-2231.52		47.3007	-5471
47.8068	-9179.75		-9166.79	-12.9638		52.0637	-6364.61		47.8376	-7414.62		51.9993	-2221.41		47.7998	-5381.9
48.3022	-9118.16		-9132.91	14.7516		52.5626	-6386.13		48.3336	-7428.37		52.4949	-2328.75		48.2977	-5347.71
48.7966	-9129.83		-9098.98	-30.8521		53.0603	-6369.04		48.8268	-7181.74		52.9909	-2278.36		48.7946	-5672.48
49.2952	-9092.4		-9064.61	-27.7839		53.5555	-6353.71		49.3243	-6921.06		53.4894	-2414.25		49.2916	-5304.6
49.7934	-9100.44		-9030.11	-70.3301		54.051	-6293.64		49.8219	-6779.11		53.9848	-2466.62		49.7907	-5134.9
50.2906	-9068.17		-8995.5	-72.6713		54.546	-6300.46		50.3172	-6728.32		54.4841	-2594.35		50.2862	-5189.11
50.7846	-9008.86		-8960.91	-47.9588		55.0451	-6297.14		50.8185	-6456.57		54.9828	-2628.18		50.7819	-4632.55
51.285	-8981.53		-8925.64	-55.8918		55.5421	-6266.02		51.3141	-6381.97		55.4768	-2731.23		51.2792	-4677.89
51.7834	-8983.44		-8890.26	-93.1778		56.041	-6202.31		51.8074	-6114.73		55.9754	-2903.31		51.7781	-4970.14
52.2814	-8924.61		-8854.63	-69.9833		56.5387	-6260.76		52.3059	-5994.04		56.4705	-2963.73		52.2741	-5241.62
52.774	-8940.8		-8819.07	-121.73		57.0359	-6233.67		52.8033	-5801.22		56.9638	-3114.04		52.7689	-4641.71
53.2728	-8838.8		-8782.72	-56.0889		57.5373	-6206.27		53.2985	-5505.47		57.4607	-3218.55		53.2645	-4325.4
53.7692	-8864.47		-8746.14	-118.328		58.033	-6192.81		53.7971	-5497.95		57.9588	-3317.54		53.7628	-4182.89
54.2672	-8778.88		-8709.01	-69.8678		58.5278	-6175.65		54.2936	-5238.07		58.4576	-3455.94		54.2575	-3936.16
54.7644	-8728.76		-8671.45	-57.3098		59.0238	-6176.76		54.7941	-4906.4		58.9568	-3568.54		54.756	-3638.74
55.264	-8675.55		-8633.16	-42.383		59.5252	-6186.24		55.2928	-4938.88		59.4529	-3642.16		55.2535	-3609.19
55.7608	-8660.54		-8594.48	-66.0585		60.0235	-6115.01		55.7892	-4868.6		59.9518	-3756.58		55.7535	-3497.87
56.2586	-8661.77		-8555.04	-106.731		60.5203	-6151.71		56.2833	-4541.35		60.4478	-3876.89		56.2511	-3220.43
56.7526	-8582.73		-8515.15	-67.5815		61.0152	-6097.13		56.7752	-4641.73		60.9419	-3979.64		56.7459	-3292.64
57.2508	-8540.71		-8474.08	-66.6355		61.5135	-6062.86		57.273	-4467.25		61.4382	-4114.05		57.2437	-2878.17
57.747	-8480.93		-8432.23	-48.6944		62.0142	-6090.14		57.7729	-4339.06		62.0952	-4377.91		57.7425	-2822.09
58.2458	-8440.07		-8389.12	-50.9458		62.5113	-6043.81		58.2693	-4165.69		62.6326	-4328.12		58.239	-2630.73
58.7446	-8465.98		-8344.84	-121.134		63.0076	-6035.13		58.7645	-3967.4		63.1302	-4364.12		58.7366	-2189.73
59.242	-8343.02		-8299.39	-43.6309		63.5037	-6050.12		59.2625	-3966.51		63.6268	-4462.38		59.2341	-1871.69
59.7376	-8298.78		-8252.66	-46.117		63.9995	-6009.33		59.7621	-3863.68		64.1272	-4532.02		59.7308	-1697.79
60.2334	-8265.8		-8204.33	-61.4748		64.4977	-5996.8		60.2596	-4121.08		64.6233	-4619.59		60.2317	-1416.1
60.7292	-8253.42		-8154.22	-99.1983		64.9938	-6040.62		60.7525	-3659.92		65.1189	-4659.62		60.7235	-881.026
61.23	-8226.16		-8101.62	-124.535		65.4929	-5971.86		61.2501	-3800.13		65.6172	-4720.3		61.2203	-776.331
61.7282	-8098.13		-8047.08	-51.0417		65.9899	-5948.01		61.7469	-3544.77		66.1113	-4779.7		61.7173	-359.188
62.2232	-8071.53		-7990.48	-81.0498		66.4857	-5963.71		62.2436	-3642.31		66.6081	-4802.27		62.2134	-179.996
62.7234	-7980.86		-7930.55	-50.307		66.983	-5945.38		62.7433	-3588.05		67.1058	-4863.9		62.7083	56.9738
63.2178	-7967.6		-7868.36	-99.2484		67.4776	-5934.88		63.2419	-3596.84		67.6039	-4961.91		63.2071	567.418
63.7142	-7845.84		-7802.61	-43.2325		67.978	-5894.07		63.7405	-3520.78		68.1006	-5022.79		63.7077	1005.15
64.211	-7811.93		-7733.16	-78.7735		68.4758	-5890.46		64.2366	-3591.14		68.5955	-5029.95		64.2035	1232.18
64.708	-7725.73		-7659.63	-66.0925		68.9673	-5882.67		64.7311	-3708.37		69.0964	-5045.57		64.6989	1516.43
65.2042	-7614.39		-7581.77	-32.613		69.4633	-5823.97		65.2311	-3699.8		69.5951	-5130.72		65.1946	1618.74
65.7022	-7522.44		-7498.7	-23.7479		69.9607	-5838.9		65.7267	-3669.84		70.0895	-5166.35		65.6928	2029.28
66.201	-7462.76		-7410.02	-52.7413		70.4607	-5860.91		66.2216	-3686.83		70.5859	-5128.99		66.1899	2201
66.6986	-7347.3		-7315.56	-31.7393		70.9605	-5862.51		66.7201	-3889.57		71.0842	-5210.93		66.6853	2520.21
67.1932	-7198.11		-7215.14	17.0298		71.457	-5783.55		67.2162	-4159.56		71.5799	-5200.83		67.1815	2753.61
67.6908	-7170.51		-7106.92	-63.5887		71.9557	-5789.65		67.7145	-4069.29		72.0777	-5236.14		67.6809	2795.7
68.1904	-7046.46		-6990.3	-56.1607		72.4498	-5789.21		68.2117	-3983.01		72.5729	-5260.76		68.1775	2714.33
68.6832	-6894.76		-6866.72	-28.0395		72.9418	-5760.67		68.7059	-4190.76		73.0688	-5251.05		68.6714	3077
69.1796	-6744.53		-6732.87	-11.655		73.44	-5773.75		69.2031	-4178.39		73.5687	-5250.5		69.1704	2740.81
69.676	-6614.9		-6588.8	-26.0957		73.9351	-5754.59		69.6978	-4384.54		74.0658	-5224.59		69.6675	3068.85
70.1736	-6432.82		-6433.23	0.410695		74.4335	-5783.76		70.1944	-4406.28		74.5621	-5227.26		70.1636	3111.13
70.6726	-6299.8		-6265.08	-34.7238		74.9299	-5747.79		70.6942	-4639.74		75.0571	-5261.64		70.6607	2881.45
71.168	-6144.18		-6085.15	-59.028		75.4294	-5719.23		71.1915	-4643.68		75.5528	-5248.5		71.1583	2889.84
71.6668	-5936.97		-5889.92	-47.0489		75.9279	-5700.71		71.6881	-4708.29		76.0473	-5283.92		71.6557	3136.56
72.1636	-5688.4		-5680.43	-7.96697		76.4245	-5658.84		72.1841	-4678.66		76.5456	-5312.26		72.1499	2640.46
72.6572	-5467.84		-5456.42	-11.4166		76.9204	-5648.07		72.6779	-4928.03		77.0431	-5247.22		72.6452	2391.5
73.1546	-5226.84		-5213.71	-13.1311		77.4184	-5639.49		73.1757	-5029.37		77.54	-5296.39		73.1435	2133.91
73.6524	-4978.97		-4952.76	-26.2117		77.9145	-5663.82		73.6707	-5064.19		78.0398	-5261.83		73.6385	2089.19
74.1484	-4688.8		-4673.94	-14.8621		78.4097	-5617.76		74.1683	-5150.7		78.5371	-5322.42		74.1376	1901.47
74.6452	-4344.03		-4375.03	30.9973		78.9072	-5587.49		74.6651	-5085.79		79.0321	-5324.21		74.6374	1608.4
75.1422	-3994.25		-4055.69	61.4428		79.4034	-5582.12		75.1649	-5209.98		79.5319	-5272.89		75.1304	1303.98
75.6388	-3622.19		-3715.85	93.6596		79.8998	-5548.09		75.6612	-5227.83		80.0269	-5250.91		75.6275	1295.58
76.136	-3297.66		-3354.55	56.8861		80.3956	-5500.43		76.1578	-5273.97		80.52	-5283.65		76.1239	1342.05
76.6334	-2880.57		-2972.05	91.4846		80.8928	-5529.45		76.6541	-5346.98		81.0165	-5252.63		76.6215	893.968
77.1288	-2417.05		-2570.54	153.49		81.3901	-5455.05		77.1512	-5462.85		81.5143	-5259.69		77.1186	401.206
77.6274	-2055.23		-2146.49	91.262		81.8881	-5469.16		77.6487	-5457.32		82.0121	-5259.18		77.6165	356.302
78.1258	-1598.51		-1703.82	105.314		82.3875	-5442.53		78.1466	-5381.91		82.5091	-5261.42		78.115	189.709
78.6248	-1127.9		-1243.55	115.652		82.8854	-5399.74		78.6448	-5553.75		83.0068	-5272.26		78.6132	0.969894
79.1224	-637.899		-769.859	131.96		83.3828	-5393.81		79.1433	-5587.71		83.5037	-5241.24		79.1114	-26.7703
79.6188	-180.174		-285.542	105.368		83.88	-5368.52		79.6402	-5600.08		84.0026	-5235.88		79.6073	-227.077
80.1138	273.338		205.644	67.6946		84.3729	-5354.63		80.135	-5658.57		84.4968	-5215.24		80.1052	-458.313
80.6058	789.18		697.977	91.2035		84.8682	-5342.01		80.6296	-5756.62		84.9944	-5241.31		80.599	-668.986
81.104	1257.26		1196.01	61.2451		85.3652	-5302.02		81.1278	-5869.34		85.492	-5190.14		81.0971	-775.936
81.6034	1699.47		1689.44	10.0253		85.8646	-5213.55		81.6237	-5961.29		85.9891	-5179.11		81.595	-1235.59
82.101	2167.64		2169.52	-1.88679		86.3616	-5177.43		82.119	-5941.74		86.4853	-5158.21		82.0903	-1375.65
82.5988	2651.86		2632.11	19.7533		86.8609	-5139.48		82.6184	-5978.12		86.9822	-5171.96		82.5886	-1284.1
83.0946	3124		3068.94	55.0611		87.3569	-5165.63		83.1169	-5981.62		87.4812	-5177.91		83.0843	-1230.65
83.59	3434.59		3475.28	-40.692		87.8532	-5074.07		83.6143	-5999.68		87.9784	-5163.61		83.5812	-1121.34
84.0874	3777.1		3846.75	-69.6476		88.348	-5060.96		84.111	-5901.6		88.4725	-5146.07		84.0774	-1352.36
84.582	4116.01		4174.02	-58.0101		88.8438	-5022.28		84.6055	-6008.63		88.9699	-5193.09		84.5706	-1360.36
85.0808	4361.37		4456.24	-94.8637		89.3397	-4952.5		85.1016	-6189.14		89.4675	-5127.19		85.0688	-1696.33
85.5778	4574.85		4685.11	-110.256		89.8394	-4895.09		85.5994	-6124.21		89.9642	-5154.84		85.5676	-1631.7
86.0744	4751.19		4858.02	-106.835		90.3367	-4824.26		86.0983	-6085.2		90.463	-5155.15		86.0648	-1788.13
86.5742	4880.71		4973.23	-92.5206		90.8361	-4772.62		86.5953	-5981.45		90.9587	-5150.84		86.5632	-2570.35
87.0684	4966.94		5027.83	-60.8914		91.3334	-4646.99		87.0933	-5934.22		91.4574	-5174.65		87.0603	-2303.45
87.5644	4961.39		5023.22	-61.8319		91.8292	-4583.51		87.5899	-6051.02		91.9549	-5120.89		87.5591	-2238.23
88.0626	4878.87		4959.86	-80.9858		92.3247	-4477.27		88.0849	-6196.48		92.4525	-5195.17		88.0535	-2127.52
88.5578	4787.25		4840.86	-53.6034		92.8222	-4378.01		88.5817	-6099.36		92.9482	-5134.26		88.5495	-2221.7
89.056	4631.7		4668.18	-36.4789		93.3193	-4209.32		89.0784	-6134.89		93.4464	-5139.6		89.0502	-1948.61
89.5532	4475.43		4447.23	28.1928		93.8167	-4113.26		89.5759	-6041.67		93.9448	-5092.35		89.5465	-2309.51
90.0512	4191.19		4182.33	8.85517		94.3133	-3952.37		90.0739	-6113.09		94.4418	-5099.5		90.041	-2387.73
90.5488	3890.44		3879.69	10.7527		94.8119	-3794.14		90.5707	-6183.58		94.9398	-5076.68		90.5369	-2630.13
91.0458	3559.36		3545.51	13.8493		95.3095	-3606.82		91.068	-6135.61		95.4368	-5166.63		91.0339	-1862.69
91.5432	3259.97		3185.23	74.7342		95.8077	-3367.78		91.5646	-6107.33		95.9331	-5080.88		91.534	-2187.29
92.0386	2851.87		2806.75	45.1262		96.303	-3159.3		92.0623	-6034.41		96.4289	-5079.54		92.0305	-3151.26
92.5354	2478.41		2413.31	65.0907		96.8023	-2872.69		92.561	-6157.54		96.9257	-5068.63		92.5279	-2485.74
93.034	2088.92		2010.02	78.8979		97.2986	-2590.16		93.0574	-6034.4		97.4228	-5014.56		93.0253	-2656.73
93.5308	1712.08		1604.87	107.208		97.7962	-2272.68		93.5547	-5942.65		97.9197	-5011.67		93.5223	-2583.91
94.029	1320.23		1199.83	120.401		98.2937	-1948.3		94.0527	-6019.13		98.4169	-5014.71		94.0199	-2924.72
94.5258	903.412		801.184	102.228		98.7892	-1553.55		94.5484	-5956.83		98.9138	-4986.92		94.5177	-3259.85
95.024	482.921		410.141	72.7795		99.2858	-1157.68		95.0465	-6204.09		99.4115	-4983.02		95.0163	-3076.76
95.5232	148.898		29.9635	118.934		99.7829	-694.506		95.5458	-6220.74		99.9091	-4961.19		95.5139	-2928.93
96.0196	-205.409		-334.205	128.796		100.28	-147.546		96.0413	-6093.8		100.404	-4930.83		96.0098	-3492.99
96.5146	-603.345		-681.786	78.4413		100.776	403.972		96.5335	-6095.4		100.901	-4871.25		96.5031	-3286.04
97.0116	-920.39		-1013.82	93.4323		101.276	973.531		97.0301	-6121.66		101.398	-4891.27		97.0035	-3457.85
97.5122	-1273		-1330.18	57.1828		101.772	1590.4		97.5264	-6294.69		101.895	-4915.51		97.5001	-3156.62
98.008	-1627.19		-1625.1	-2.09221		102.268	2295.59		98.0253	-6246.4		102.393	-4863.09		97.9959	-3015.57
98.5054	-1861.38		-1902.34	40.9585		102.765	3047.37		98.5237	-6314.32		102.891	-4808.26		98.4925	-2940.24
99.003	-2154.09		-2161.09	6.99233		103.265	3850.39		99.0222	-6250.65		103.39	-4932.08		98.9908	-3172.62
99.5006	-2417.73		-2401.5	-16.2296		103.761	4555.1		99.5206	-6473.01		103.886	-4897.22		99.4892	-3117.97
99.9994	-2654.88		-2624.54	-30.3368		104.256	5382.58		100.016	-6415.46		104.382	-4822.99		99.9862	-3288.56
100.49	-2844.82		-2826.98	-17.8339		104.752	6212.02		100.509	-6397.03		104.879	-4878.83		100.48	-3504.26
100.99	-3084.33		-3016.71	-67.6181		105.249	7011.48		101.007	-6353.68		105.376	-4801.19		100.978	-3518.87
101.488	-3244.17		-3189.8	-54.3666		105.745	7784.73		101.506	-6409.23		105.871	-4811.72		101.475	-3503.87
101.98	-3413.4		-3346.05	-67.3408		106.243	8551.03		102.004	-6352.71		106.368	-4790.75		101.973	-3560.19
102.48	-3534.89		-3490.67	-44.2209		106.742	9271.32		102.502	-6301.97		106.866	-4744.93		102.47	-3828.13
102.98	-3640.22		-3621.87	-18.3586		107.239	9927.38		102.999	-6238.05		107.363	-4761.7		102.967	-3271.93
103.474	-3731.72		-3739.15	7.43331		107.737	10506.3		103.496	-6486.87		107.861	-4668.17		103.466	-3669.59
103.97	-3872.78		-3845.4	-27.3747		108.234	10980.5		103.992	-6257.64		108.357	-4702.6		103.963	-4000.57
104.466	-3990.64		-3940.93	-49.707		108.732	11291.8		104.486	-6232.27		108.853	-4647.06		104.457	-3871.07
104.96	-4134.13		-4026.19	-107.943		109.228	11578.6		104.984	-6361.24		109.35	-4652.41		104.952	-4048.68
105.46	-4154.74		-4103.19	-51.5521		109.727	11674.7		105.482	-6300.46		109.848	-4632.28		105.45	-3844.23
105.96	-4269.15		-4171.56	-97.5939		110.224	11645.3		105.979	-6244.98		110.348	-4577.82		105.948	-3837.83
106.46	-4345.78		-4231.98	-113.8		110.72	11479		106.475	-6181.23		110.846	-4591.86		106.446	-3892.1
106.96	-4376.18		-4285.09	-91.0895		111.218	11226.5		106.972	-6304.42		111.345	-4604.69		106.943	-4073.67
107.454	-4386.91		-4330.98	-55.9231		111.715	10861.6		107.471	-6354.94		111.84	-4543.79		107.439	-3788.24
107.95	-4387.58		-4371.02	-16.5593		112.211	10367.8		107.966	-6310.56		112.336	-4642.15		107.937	-3981.53
108.448	-4429.48		-4405.64	-23.8463		112.707	9815.76		108.461	-6322.18		112.833	-4549.04		108.433	-3933.22
108.94	-4523.6		-4434.82	-88.7879		113.204	9220.61		108.96	-6425.19		113.332	-4521.6		108.931	-4115.35
109.44	-4545.94		-4459.8	-86.1454		113.701	8599.68		109.458	-6306.49		113.828	-4561.63		109.428	-4048.53
109.94	-4559.61		-4480.47	-79.1382		114.196	7951.9		109.957	-6443.86		114.324	-4480.01		109.926	-4196.13
110.434	-4544.92		-4497.05	-47.8634		114.695	7285.78		110.454	-6279.13		114.82	-4444.94		110.422	-4352.5
110.93	-4608.72		-4510.19	-98.5278		115.192	6550.95		110.948	-6340.76		115.315	-4512.62		110.918	-4131.24
111.43	-4583.36		-4520.19	-63.1703		115.688	5851.96		111.445	-6282.11		115.813	-4462.5		111.416	-3984.36
111.928	-4537.72		-4527.21	-10.518		116.184	5234.21		111.942	-6272.32		116.308	-4437.01		111.914	-3846.67
112.42	-4545.8		-4531.51	-14.2826		116.68	4559.05		112.437	-6571.04		116.806	-4364.31		112.409	-3951.36
112.92	-4486.7		-4533.46	46.7627		117.18	3975.92		112.934	-6395.44		117.305	-4367.82		112.905	-3867.76
113.42	-4584.62		-4533.19	-51.4358		117.677	3454.37		113.432	-6709.85		117.801	-4345.81		113.405	-4276.58
113.918	-4496.12		-4530.91	34.7912		118.175	2981.18		113.932	-6656.76		118.298	-4356.96		113.903	-4176.76
114.41	-4488.72		-4526.88	38.1546		118.672	2408.82		114.428	-6728.84		118.796	-4380.83		114.4	-4436.08
114.91	-4479.12		-4521.14	42.0116		119.169	2070.12		114.923	-6570.29		119.294	-4365.79		114.898	-4350.2
115.41	-4502.7		-4513.89	11.188		119.664	1727.03		115.42	-6497.43		119.79	-4331.5		115.394	-4476.58
115.902	-4492.74		-4505.44	12.7006		120.159	1401.3		115.918	-6512.28					115.889	-4203.98
116.4	-4505.15		-4495.66	-9.48511		120.653	1144.68		116.413	-6645.36					116.383	-4445.27
116.89	-4585.12		-4484.97	-100.146		121.15	824.917		116.91	-6850.46					116.879	-4808.63
117.39	-4378.98		-4473.06	94.0786		121.649	581.371		117.408	-6800.09					117.377	-4752.44
117.89	-4417.27		-4460.25	42.9839		122.146	340.043		117.904	-6726.65					117.873	-4826.59
118.384	-4420.07		-4446.78	26.7166		122.644	154.142		118.402	-6909.5					118.371	-4923.37
118.88	-4309.24		-4432.54	123.298		123.141	-59.035		118.898	-6811.62					118.869	-3879.54
119.38	-4312.82		-4417.52	104.706		123.638	-156.705		119.395	-6634.35					119.366	-3650.67
119.88	-4233.33		-4401.91	168.578		124.135	-285.525		119.891	-6774.38					119.861	-3321.35
						124.625	-375.508								120.356	-3083.07
						125.122	-486.328								120.853	-3142.78
						125.62	-555.092								121.351	-2800.02
						126.116	-608.966								121.849	-2835.33
						126.615	-646.708								122.347	-2796.24
						127.112	-691.577								122.845	-2476.06
						127.609	-732.968								123.341	-2794.84
						128.103	-792.992								123.839	-2680.71
						128.599	-810.583								124.331	-2589.82
						129.096	-807.235								124.824	-2518.06
						129.592	-833.656								125.323	-2537.85
															125.82	-2254.02
															126.318	-2605.83
															126.816	-2681.49
															127.312	-2698.15
															127.809	-2523.09
															128.303	-2529.36
															128.797	-2524.24
															129.294	-2798.63
