# Supplementary material for: Structural and thermodynamic analyses of the β-to-α transformation in RfaH reveal principles of fold-switching proteins
Source: eLife. 2022 Oct 18;11:e76630. doi: 10.7554/eLife.76630 (PMC9683785; doi:10.7554/eLife.76630)
Supplement: Figure 3—source data 1. [file elife-76630-fig3-data1.xlsx]

## Sheet: CD-based chemical denaturation
EcNusG-KOW				MtNusG-KOW				MjSpt5-KOW				hSpt5-KOW5				EcRfaH-KOW				VcRfaH-KOW
urea, pH 7				urea, pH 7				urea, pH 7				urea, pH 7				urea, pH 7				urea, pH 7
Wavelength	218	nm		Wavelength	221	nm		Wavelength	219	nm		Wavelength	226	nm		Wavelength	219	nm		Wavelength	224	nm
[Protein]	0.0567114	mM		[Protein]	0.0569127	mM		[Protein]	0.056802	mM		[Protein]	0.042768	mM		[Protein]	0.057047	mM		[Protein]	0.053276	mM
Lightpath	0.1	cm		Lightpath	0.1	cm		Lightpath	0.1	cm		Lightpath	0.1	cm		Lightpath	0.1	cm		Lightpath	0.1	cm
# Amino acids	63			# Amino acids	62			# Amino acids	69			# Amino acids	62			# Amino acids	66			# Amino acids	67
[urea] (M)	CD (mdeg)	QMRW (deg*cm^2/dmol)		[urea] (M)	CD (mdeg)	QMRW (deg*cm^2/dmol)		[urea] (M)	CD (mdeg)	QMRW (deg*cm^2/dmol)		[urea] (M)	CD (mdeg)	QMRW (deg*cm^2/dmol)		[urea] (M)	CD (mdeg)	QMRW (deg*cm^2/dmol)		[urea] (M)	CD (mdeg)	QMRW (deg*cm^2/dmol)
0.500607	-11.3779	-3184.57		0	-11.9039	-3373.56		0	-12.4368	-3173.19		0	-0.588159	-221.812		0	-14.3373	-3807.94		0	-15.6082	-4372.67
1.01419	-11.5451	-3231.37		0.500607	-11.8263	-3351.57		0.459338	-12.6179	-3219.4		0.323794	-0.604779	-228.079		0.282558	-14.3323	-3806.62		0.955097	-15.5535	-4357.34
1.52316	-11.641	-3258.21		1.03193	-11.7659	-3334.45		0.937371	-12.6103	-3217.46		0.683465	-0.623366	-235.089		0.553679	-14.6267	-3884.81		1.44614	-15.7871	-4422.79
2.03944	-11.5128	-3222.33		1.54094	-11.5716	-3279.39		1.44022	-12.4849	-3185.46		0.978734	-0.848038	-319.819		0.819236	-14.4183	-3829.46		1.91469	-15.3062	-4288.06
2.56913	-11.4776	-3212.48		2.06916	-11.506	-3260.8		1.95032	-12.8707	-3283.9		1.32178	-0.809471	-305.275		1.09105	-14.3377	-3808.05		2.40231	-14.7822	-4141.26
3.05264	-11.3468	-3175.87		2.59297	-11.4635	-3248.75		2.43804	-12.7821	-3261.29		1.64765	-1.0257	-386.821		1.36915	-14.3391	-3808.42		2.86743	-14.632	-4099.18
3.57358	-11.6223	-3252.98		3.58558	-11.1927	-3172.01		2.87937	-13.1777	-3362.23		1.97408	-0.995974	-375.61		1.65358	-14.2736	-3791.03		3.34583	-13.8846	-3889.8
4.01205	-11.3219	-3168.9		4.18057	-10.5892	-3000.96		3.40574	-13.0515	-3330.03		2.30111	-1.15252	-434.648		1.91469	-14.1224	-3750.87		3.84372	-13.2185	-3703.19
4.40355	-11.348	-3176.2		4.66313	-10.0957	-2861.12		3.89781	-13.3049	-3394.68		2.62278	-1.39548	-526.275		2.19996	-13.493	-3583.7		4.31311	-12.1022	-3390.45
4.82636	-11.4032	-3191.65		5.18978	-9.07437	-2571.67		4.37943	-13.1723	-3360.85		2.96897	-1.78423	-672.884		2.4857	-12.8953	-3424.95		4.80216	-10.5207	-2947.39
5.25045	-11.4012	-3191.09		5.68804	-8.56029	-2425.98		4.86266	-13.279	-3388.07		3.29793	-2.31628	-873.535		2.73014	-12.9622	-3442.72		5.28079	-9.24751	-2590.71
5.63935	-11.3001	-3162.8		6.22486	-8.37336	-2373.01		5.33542	-13.3545	-3407.34		3.70559	-2.67014	-1006.99		3.02275	-12.6717	-3365.57		5.7733	-8.06115	-2258.35
6.05381	-10.7585	-3011.21		6.72713	-7.5748	-2146.7		5.82813	-13.4977	-3443.87		4.11434	-3.21431	-1212.21		3.32188	-12.6795	-3367.64		6.26155	-7.41472	-2077.25
6.48187	-10.6336	-2976.25		7.22528	-7.38603	-2093.2		6.32271	-13.1103	-3345.03		4.5363	-3.59358	-1355.24		3.58558	-12.2646	-3257.44		6.72713	-6.51251	-1824.49
6.85608	-10.0771	-2820.49		7.75645	-7.14256	-2024.2		6.75168	-13.8491	-3533.53		4.95345	-4.03947	-1523.4		3.86175	-11.5909	-3078.51		7.20063	-6.29995	-1764.94
7.26842	-9.73775	-2725.51		8.26518	-6.94715	-1968.82		7.24377	-13.4283	-3426.17		5.3415	-3.89883	-1470.36		3.96995	-11.3661	-3018.8		7.69456	-6.00038	-1681.02
7.70075	-8.98597	-2515.09		8.80742	-6.43038	-1822.37		7.73788	-13.4324	-3427.21		5.77939	-3.99788	-1507.71		4.10832	-11.0948	-2946.75		8.16574	-5.55237	-1555.51
8.10363	-8.44279	-2363.06		9.30839	-6.21137	-1760.3		8.20923	-13.8414	-3531.57		6.18819	-4.24295	-1600.14		4.39752	-10.6653	-2832.67		8.66382	-5.45061	-1527
8.50793	-8.17212	-2287.3						8.69502	-13.5184	-3449.15		6.62283	-3.93094	-1482.47		4.70543	-10.374	-2755.3
8.95747	-8.12489	-2274.08						9.17666	-13.4524	-3432.31						4.97767	-9.97255	-2648.68
9.33349	-7.90304	-2211.99						9.72973	-13.1943	-3366.46						5.22011	-9.93435	-2638.53
9.76754	-7.74118	-2166.69														5.5177	-9.94866	-2642.33
																5.79767	-9.97244	-2648.65
																6.06602	-9.42125	-2502.26
																6.34718	-9.37413	-2489.74
																6.6167	-9.77112	-2595.18
																6.8991	-9.85305	-2616.94
urea, pH 4				urea, pH 4				urea, pH 4				urea, pH 4				urea, pH 4				urea, pH 4
Wavelength	217	nm		Wavelength	220	nm		Wavelength	220	nm		Wavelength	226	nm		N/A, native-state aggregation				Wavelength	224	nm
[Protein]	0.0481429	mM		[Protein]	0.0479967	mM		[Protein]	0.0638939	mM		[Protein]	0.04524	mM						[Protein]	0.0542	mM
Lightpath	0.1	cm		Lightpath	0.1	cm		Lightpath	0.1	cm		Lightpath	0.1	cm						Lightpath	0.1	cm
# Amino acids	63			# Amino acids	62			# Amino acids	69			# Amino acids	62							# Amino acids	67
[urea] (M)	CD (mdeg)	QMRW (1000*deg*cm^2/dmol)		[urea] (M)	CD (mdeg)	QMRW (1000*deg*cm^2/dmol)		[urea] (M)	CD (mdeg)	QMRW (1000*deg*cm^2/dmol)		[urea] (M)	CD (mdeg)	QMRW (1000*deg*cm^2/dmol)						[urea] (M)	CD (mdeg)	QMRW (1000*deg*cm^2/dmol)
0	-13.2722	-4375.92		0	-10.9486	-3679.22		0	-15.5496	-3527.04		0	-1.19487	-425.997						0	-15.9092	-4381.01
0.500607	-13.7013	-4517.4		0.518296	-11.1034	-3731.24		0.441653	-16.0666	-3644.31		0.412182	-1.41746	-505.355						0.400395	-16.1331	-4442.67
1.00237	-13.4329	-4428.91		1.00237	-11.1361	-3742.23		0.925554	-15.4628	-3507.36		0.825142	-1.91951	-684.347						0.801522	-15.6217	-4301.84
1.55872	-13.3556	-4403.42		1.53502	-11.1152	-3735.21		1.4106	-16.1458	-3662.28		1.23893	-2.42004	-862.796						1.23893	-15.9276	-4386.08
2.05727	-13.677	-4509.39		2.05727	-10.8466	-3644.94		1.87906	-15.8761	-3601.1		1.65951	-2.83709	-1011.48						1.62393	-15.2609	-4202.48
2.52145	-13.2774	-4377.64		2.55721	-10.6647	-3583.82		2.38445	-16.2291	-3681.17		2.06916	-3.5381	-1261.41						2.05727	-14.5982	-4019.99
3.08253	-13.2318	-4362.6		3.08253	-10.6656	-3584.12		2.83757	-16.4817	-3738.47		2.46187	-4.01037	-1429.78						2.45591	-13.8107	-3803.13
3.56159	-13.5409	-4464.52		3.58558	-10.7532	-3613.56		3.29793	-16.4944	-3741.35		2.90326	-4.16591	-1485.24						2.62875	-14.3297	-3946.05
4.1023	-13.5011	-4451.39		4.1023	-10.6107	-3565.67		3.8257	-16.3595	-3710.75		3.3099	-4.51168	-1608.51						2.86743	-13.4031	-3690.89
4.5846	-13.5074	-4453.48		4.62084	-9.89379	-3324.76		4.25887	-16.923	-3838.57		3.69359	-4.66774	-1664.15						3.08253	-13.0011	-3580.19
5.26258	-13.2343	-4363.43		5.12915	-9.12701	-3067.08		4.77193	-16.7103	-3790.32		4.11434	-4.91294	-1751.57						3.26201	-12.0431	-3316.38
5.61501	-12.8992	-4252.94		5.61501	-8.35995	-2809.32		5.23831	-16.5567	-3755.48		4.52423	-4.64093	-1654.59						3.46566	-11.563	-3184.17
6.1332	-12.4203	-4095.04		6.16375	-7.79233	-2618.57		5.73675	-16.3825	-3715.97		4.93529	-4.75775	-1696.24						3.68158	-10.6923	-2944.4
6.28601	-12.1099	-3992.7		6.32271	-7.43642	-2498.97		6.21264	-16.3341	-3704.99		5.35971	-4.65741	-1660.47						3.87377	-10.3144	-2840.34
6.62283	-11.7038	-3858.81		6.69031	-7.16764	-2408.65		6.67804	-16.1926	-3672.89		5.76721	-4.82805	-1721.3						4.1324	-9.02279	-2484.66
7.30542	-10.7986	-3560.38		7.17599	-6.96214	-2339.59		7.15751	-16.2091	-3676.64		6.1943	-4.33084	-1544.04						4.28298	-9.02507	-2485.29
7.65126	-10.1594	-3349.62		7.70075	-6.81933	-2291.6		7.65126	-16.5205	-3747.27		6.57991	-4.33225	-1544.54						4.48198	-8.32715	-2293.1
8.1968	-9.52496	-3140.44		8.17195	-6.66413	-2239.45		8.15953	-16.0582	-3642.41		6.96057	-4.65965	-1661.27						4.70543	-8.05648	-2218.56
8.71999	-8.62237	-2842.85		8.69502	-6.65712	-2237.09		8.65758	-15.5904	-3536.3		7.42265	-4.63552	-1652.66						4.88686	-7.28888	-2007.18
9.20801	-8.17095	-2694.01		9.22682	-6.40377	-2151.95		9.0952	-15.4603	-3506.79		7.84315	-4.32029	-1540.28						5.31114	-6.48808	-1786.66
9.64784	-8.29407	-2734.61		9.63525	-6.76866	-2274.57		9.49684	-14.7016	-3334.7										5.73675	-5.80332	-1598.09
																				6.15153	-5.67374	-1562.41
																				6.54927	-5.01154	-1380.06
																				6.96057	-4.90569	-1350.91
																				7.33009	-4.92464	-1356.13
																				7.78741	-4.79869	-1321.44
																				8.18438	-4.60762	-1268.83
GdmCl, pH 7				GdmCl, pH 7				GdmCl, pH 7				GdmCl, pH 7				GdmCl, pH 7				GdmCl, pH 7
Wavelength	218	nm		Wavelength	220	nm		Wavelength	220	nm		Wavelength	226	nm		Wavelength	216	nm		Wavelength	224	nm
[Protein]	0.0474699	mM		[Protein]	0.0482819	mM		[Protein]	0.058293	mM		[Protein]	0.04	mM		[Protein]	0.0502549	mM		[Protein]	0.02427	mM
Lightpath	0.1	cm		Lightpath	0.1	cm		Lightpath	0.1	cm		Lightpath	0.1	cm		Lightpath	0.1	cm		Lightpath	0.1	cm
# Amino acids	63			# Amino acids	62			# Amino acids	69			# Amino acids	62			# Amino acids	66			# Amino acids	67
[GdmCl] (M)	CD (mdeg)	QMRW (1000*deg*cm^2/dmol)		[GdmCl] (M)	CD (mdeg)	QMRW (1000*deg*cm^2/dmol)		[GdmCl] (M)	CD (mdeg)	QMRW (1000*deg*cm^2/dmol)		[GdmCl] (M)	CD (mdeg)	QMRW (1000*deg*cm^2/dmol)		[GdmCl] (M)	CD (mdeg)	QMRW (1000*deg*cm^2/dmol)		[GdmCl] (M)	CD (mdeg)	QMRW (1000*deg*cm^2/dmol)
0	-12.0435	-4027.12		0	-12.1001	-4042.15		0	-11.4416	-2844.6		0	-0.285964	-115.308		0	-21.0189	-6337.05		0	-7.73577	-4757.28
0.325272	-12.2691	-4102.55		0.325272	-12.001	-4009.05		0.324099	-11.7261	-2915.33		0.325272	-0.437677	-176.483		0.108424	-20.8592	-6288.9		0.105713	-7.75406	-4768.53
0.650544	-11.7915	-3942.85		0.650544	-11.6575	-3894.3		0.638972	-11.5905	-2881.62		0.650544	-0.55739	-224.754		0.216848	-20.6961	-6239.73		0.211427	-7.438	-4574.16
0.975816	-11.8052	-3947.43		0.975816	-11.2878	-3770.8		0.95888	-11.7701	-2926.27		0.975816	-0.818998	-330.241		0.325272	-20.3607	-6138.61		0.31714	-7.52889	-4630.06
1.30109	-11.3606	-3798.77		1.30109	-10.7415	-3588.3		1.28966	-11.5718	-2876.97		1.30109	-1.35444	-546.145		0.433696	-19.9297	-6008.67		0.422854	-7.34227	-4515.29
1.62636	-10.7428	-3592.19		1.62636	-9.99223	-3338		1.6107	-11.8002	-2933.76		1.62636	-1.85276	-747.081		0.54212	-19.6615	-5927.81		0.528567	-6.58733	-4051.02
1.95163	-9.85227	-3294.41		1.95163	-8.50604	-2841.52		1.92468	-11.685	-2905.11		1.95163	-2.30357	-928.859		0.650544	-18.8407	-5680.34		0.63428	-6.14909	-3781.52
2.2769	-8.40615	-2810.86		2.2769	-7.541	-2519.14		2.24629	-11.5048	-2860.31		2.2769	-2.59021	-1044.44		0.758968	-18.3583	-5534.9		0.739994	-5.85007	-3597.63
2.60218	-7.46657	-2496.68		2.60218	-6.6187	-2211.04		2.89435	-11.4006	-2834.41		2.60218	-3.0745	-1239.72		0.867392	-17.8566	-5383.64		0.845707	-5.31117	-3266.22
2.92745	-6.63697	-2219.28		2.92745	-5.65828	-1890.2		3.2176	-11.716	-2912.82		2.92745	-3.02058	-1217.98		0.975816	-17.4673	-5266.27		0.951421	-5.12806	-3153.61
3.25272	-5.74966	-1922.58		3.25272	-5.72678	-1913.08		3.49662	-11.5023	-2859.69		3.25272	-3.27915	-1322.24		1.08424	-17.4497	-5260.96		1.05713	-4.73669	-2912.93
3.57799	-5.42946	-1815.51		3.57799	-5.19608	-1735.8		3.86808	-11.354	-2822.82		3.57799	-3.21159	-1295		1.19266	-17.5533	-5292.2		1.16285	-4.52004	-2779.7
3.90326	-5.51183	-1843.05		3.90326	-4.96152	-1657.44		4.18902	-11.3339	-2817.82		4.22854	-3.22517	-1300.47		1.30109	-16.5103	-4977.74		1.26856	-3.9287	-2416.04
4.22854	-5.32539	-1780.71		4.22854	-4.59446	-1534.82		4.72624	-10.7008	-2660.42		4.55381	-3.36272	-1355.94		1.40951	-16.0099	-4826.87		1.37427	-3.99287	-2455.5
4.55381	-4.91195	-1642.46		4.55381	-4.51757	-1509.14		4.84325	-10.2738	-2554.26						1.51794	-15.4887	-4669.74		1.47999	-3.49099	-2146.86
4.87908	-5.24858	-1755.02		4.87908	-3.62002	-1209.3		5.02207	-9.65105	-2399.44						1.62636	-15.63	-4712.34		1.5857	-3.69331	-2271.28
5.20435	-5.14251	-1719.56		5.20435	-3.53179	-1179.83		5.16717	-9.24983	-2299.68						1.73478	-15.0712	-4543.86		1.69141	-3.53995	-2176.97
								5.35264	-8.68363	-2158.92						1.84321	-15.5191	-4678.9		1.79713	-3.27135	-2011.79
								5.48262	-8.12568	-2020.2						1.95163	-15.4649	-4662.56		1.90284	-3.16535	-1946.6
								5.80808	-7.73864	-1923.97						2.06006	-14.8891	-4488.96		2.00855	-3.15222	-1938.53
								6.13421	-7.38243	-1835.41
								6.4547	-7.25874	-1804.66
								6.78504	-6.92565	-1721.85
								7.14704	-6.77616	-1684.68
								7.58135	-6.61331	-1644.2

## Sheet: Fluorescence-based chemical denaturation VcRfaH-KOW
VcRfaH-KOW				VcRfaH-KOW				VcRfaH-KOW
urea, pH 7				urea, pH 4				GdmCl, pH 7
[urea] (M)	Trp Fluorescence at 380 nm	Normalized Fluorescence		[urea] (M)	Trp Fluorescence at 380 nm	Normalized Fluorescence		[GdmCl] (M)	Trp Fluorescence at 380 nm	Normalized Fluorescence
0	1.23947e+06	0		0	575713	0		0	6.56009e+06	0
0.308	1.22886e+06	-0.00216922		0.312011	607076	0.00959755		0.1057	6.92694e+06	0.0655846
0.616	1.25739e+06	0.00366375		0.624461	640117	0.0197089		0.2114	6.79753e+06	0.0424486
0.924	1.28196e+06	0.00868708		0.931462	609426	0.0103167		0.3171	7.50256e+06	0.168495
1.232	1.3024e+06	0.012866		1.17976	633987	0.0178332		0.4229	7.69053e+06	0.2021
1.54	1.34404e+06	0.0213793		1.51131	715119	0.0426612		0.5286	8.31379e+06	0.313527
1.848	1.39013e+06	0.0308024		1.83751	731883	0.0477914		0.6343	8.8595e+06	0.41109
2.156	1.44835e+06	0.0427055		2.1286	821555	0.0752329		0.74	9.32726e+06	0.494716
2.464	1.53392e+06	0.0602003		2.41422	933902	0.109614		0.8457	9.86332e+06	0.590553
2.772	1.66311e+06	0.0866132		2.75401	1.08641e+06	0.156284		0.9514	1.04396e+07	0.693584
3.08	1.77684e+06	0.109865		3.04069	1.29052e+06	0.218746		1.0571	1.06372e+07	0.728916
3.388	1.95607e+06	0.146509		3.36979	1.47975e+06	0.276655		1.1628	1.035e+07	0.677564
3.696	2.1803e+06	0.192353		3.65757	1.76866e+06	0.365068		1.2686	1.12377e+07	0.836263
4.004	2.4943e+06	0.25655		3.994	2.01363e+06	0.440034		1.3743	1.15568e+07	0.893318
4.312	2.79226e+06	0.317468		4.30106	2.27607e+06	0.520347		1.48	1.15681e+07	0.895332
4.62	3.1153e+06	0.383514		4.57252	2.4729e+06	0.580581		1.5857	1.17284e+07	0.923986
4.928	3.45071e+06	0.452088		4.99584	2.70142e+06	0.650513		1.6914	1.1916e+07	0.957526
5.236	3.88576e+06	0.541034		5.20798	2.89036e+06	0.708333		1.7971	1.17551e+07	0.928763
5.544	4.226e+06	0.610596		5.49338	3.04679e+06	0.756204		1.9028	1.20045e+07	0.973347
5.852	4.43746e+06	0.653829		5.81595	3.15713e+06	0.789971		2.0086	1.21535e+07	1
6.16	4.69069e+06	0.705602		6.12709	3.19932e+06	0.802882
6.468	4.93582e+06	0.755719		6.45737	3.32788e+06	0.842224
6.776	5.0979e+06	0.788856		6.73326	3.46159e+06	0.883142
7.084	5.30549e+06	0.831298		7.07131	3.55929e+06	0.913041
7.392	5.43065e+06	0.856887		7.3671	3.62894e+06	0.934355
7.7	5.58063e+06	0.88755		7.65126	3.66579e+06	0.945632
8.008	5.66173e+06	0.904131		7.98572	3.78437e+06	0.98192
8.316	5.81947e+06	0.936381		8.26518	3.74442e+06	0.969695
8.624	5.95567e+06	0.964227		8.57026	3.84345e+06	1
8.932	6.13064e+06	1
