# Supplementary material for: Structural and thermodynamic analyses of the β-to-α transformation in RfaH reveal principles of fold-switching proteins
Source: eLife. 2022 Oct 18;11:e76630. doi: 10.7554/eLife.76630 (PMC9683785; doi:10.7554/eLife.76630)
Supplement: Figure 5—source data 1. [file elife-76630-fig5-data1.xlsx]

## Sheet: CEST EcRfaH-KOW
			Individual Fits (13/26 Hz)													global fit (13/26 Hz), excluding residues with Dw < 1 ppm
Residue Number	Comment		d15N (major species) (ppm)	Dw (ppm)	d15N (minor species) (ppm)	sd15N (minor species) (ppm)	pB (%)	spB (%)	kex (1/s)	skex (1/s)	R2 (major species) (1/s)	sR2 (major species) (1/s)	R2 (minor species) (1/s)	sR2 (minor species) (1/s)		Dw (ppm)	d15N (minor species) (ppm)	sd15N (minor species) (ppm)	R2 (major species) (1/s)	sR2 (major species) (1/s)	R2 (minor species) (1/s)	sR2 (minor species) (1/s)
101	Proline
102	No minor species visible		120.398
103	No minor species visible		120.804
104	No minor species visible		120.562
105	No minor species visible		124.693
106	No minor species visible		126.486
107	Proline		N/A
108	Shoulder		122.257	0.755637	123.013	0.00624944	10.4495	2.38527	6.38112	1.51802	6.47973	0.104661	1.58738	0.579873
109			117.096	-1.28278	115.813	0.00951476	2.03035	0.287191	40.689	7.0736	7.06235	0.0748407	3.9558	2.27649		-1.28316	6.23229	0.00451576	7.25387	0.0458353	1.56067	0.437211
110	Proline		N/A
111	Shoulder		123.294	-1.07703	122.217	0.00791838	10.9826	4.07352	7.31388	2.79608	9.44294	0.280989	2.8932	1.09579		-1.0808	3.98899	0.00895714	9.06343	0.114926	4.05525	1.47066
112	Proline		N/A
113			114.442	-6.09748	108.345	0.00810785	3.65585	1.36538	23.2254	9.6671	10.1512	0.194706	7.80556	1.83815		-6.09545	9.64371	0.00882222	10.3614	0.119274	7.0929	1.15527
114			122.439	-2.32726	120.112	0.0104332	5.41698	4.07189	15.6743	12.3413	11.1817	0.453136	3.40194	1.10037		-2.32626	4.50231	0.00637549	11.2365	0.0932092	4.20418	0.740715
115	No minor species visible		120.723
116			116.564	5.809	122.373	0.00706403	6.91336	4.14982	11.8343	7.31129	11.0539	0.439767	8.19694	2.94344		5.80977	11.1404	0.00888087	10.9134	0.115437	9.41823	1.19871
117			118.787	7.16497	125.952	0.0058912	3.87172	1.12119	22.0322	7.04859	11.2605	0.170503	12.4654	2.61235		7.16358	15.0778	0.00705908	11.4731	0.116661	10.8839	1.29437
118			128.275	-1.81459	126.46	0.0109506	7.45001	6.98925	12.0482	11.7532	11.4034	0.724259	6.49091	4.26595		-1.81406	10.7569	0.0102736	11.3449	0.142527	10.3966	1.86629
119			120.402	-1.39878	119.003	0.00941079	2.49664	0.484494	40.7893	10.07	11.5158	0.159492	5.15036	3.2498		-1.38564	8.40016	0.00984079	12.0617	0.134972	7.09811	1.61255
120			119.429	4.19876	123.628	0.00639018	3.47826	0.694386	24.0932	5.44703	10.5856	0.117719	16.0536	2.27528		4.19668	18.3289	0.00569567	10.8118	0.0836182	11.8389	1.01462
121			107.403	3.06854	110.472	0.00542294	3.41516	0.853836	24.3862	6.65189	8.52813	0.111175	8.06517	1.78141		3.0674	9.84657	0.00558216	8.7192	0.0804016	6.08321	0.856175
122	Bad SNR		124.13
123	Major Species Peak Broadened		N/A
124			119.78	3.13153	122.912	0.0093802	4.34478	2.05431	19.9474	10.0832	16.944	0.383307	11.5506	3.91519		3.12654	15.4658	0.00893656	17.1924	0.149111	11.5987	1.36574
125			114.263	-4.95938	109.304	0.00717116	3.41961	0.814605	25.3933	6.79175	10.4638	0.138689	13.525	2.47113		-4.95622	15.9962	0.00718729	10.7287	0.100011	11.3509	1.18884
126	Shoulder		120.903	-0.72865	120.174	0.0234662	2.23387	0.190388	97.3427	15.4249	9.77533	0.145449	18.0825	5.57905
127			119.843	1.95165	121.795	0.00919796	4.44809	1.55414	18.8011	7.21511	9.71047	0.180919	22.1933	6.32169		1.94977	28.515	0.0102552	9.82159	0.105289	18.9586	2.16686
128	Major Species Peak Overlap with 161.HN		123.241
129	No minor species visible		118.655
130			127.529	-4.11007	123.419	0.0112796	5.4162	1.3432	15.6677	4.41192	10.635	0.189585	49.8809	9.89641		-4.10897	59.7773	0.011112	10.6763	0.111669	51.2967	4.60021
131			120.8	-5.14402	115.656	0.0111494	4.69546	1.06907	18.174	4.81825	10.1899	0.170864	47.4929	8.61669		-5.14245	56.1096	0.0140461	10.3019	0.142952	43.3135	4.52647
132			116.25	8.13697	124.387	0.00427357	4.14226	0.97442	18.6808	4.77236	9.91021	0.11653	12.0619	1.80632		8.13998	13.8682	0.0046959	9.99589	0.0741167	7.93402	0.706618
133	Proline		N/A
134			123.932	-3.94477	119.987	0.00768175	6.73498	5.12309	13.7909	10.7748	10.2867	0.523152	5.51036	2.36906		-3.93988	7.87942	0.00806747	10.2904	0.112994	10.9689	1.41503
135	Shoulder		108.837	0.65259	109.49	0.0245594	2.09445	0.163795	76.2451	10.9933	8.19148	0.1162	58.1824	5.23737
136			117.765	3.84894	121.614	0.0143668	6.68607	7.25125	12.1529	13.6579	10.5343	0.728633	9.92587	6.66449		3.85014	16.5904	0.0123972	10.4193	0.145857	11.0559	1.77748
137			119.376	4.68055	124.057	0.0157121	4.90259	4.42237	17.8598	17.4636	13.3026	0.662943	14.2926	8.68727		4.67927	22.9798	0.0152467	13.4387	0.235937	15.8005	2.82004
138			117.744	1.59413	119.338	0.00935761	6.25034	4.14407	14.1357	9.86598	10.8483	0.409476	5.89464	2.39986		1.59609	8.2945	0.00787077	10.8977	0.0958573	7.83562	1.13142
139	No minor species visible		115.773
140			120.732	0.918757	121.651	0.0211997	1.97788	0.40844	52.0469	15.8579	11.4596	0.171516	3.38147	5.92591		0.906824	9.30738	0.0183929	11.9146	0.152983		1.96694
141			127.151	-5.7535	121.397	0.0083967	5.92693	3.41184	16.0848	9.79113	10.8128	0.394324	11.1726	4.05048		-5.75216	15.2231	0.00928377	10.9092	0.120228	17.6142	1.85973
142			122.659	-1.96733	120.692	0.00826521	6.67617	4.29338	12.8003	8.68943	10.9111	0.43908	12.707	6.14003		-1.96747	18.847	0.00890003	10.8674	0.108065	16.2123	1.875
143			129.197	-8.5723	120.625	0.00793104	4.68849	1.59859	19.1436	7.28955	10.4646	0.216786	19.9209	4.74048		-8.57124	24.6613	0.00972581	10.6223	0.12513	21.0068	2.22394
144			120.967	-3.37852	117.588	0.0074231	6.54759	3.34996	12.3903	6.6094	10.0382	0.32981	12.5124	4.32103		-3.37972	16.8335	0.00791438	9.93803	0.0952725	13.8596	1.40005
145			125.62	-4.36546	121.255	0.00744692	4.99947	2.63224	15.6924	8.69981	9.94036	0.283849	12.2591	4.55335		-4.36633	16.8125	0.00723114	9.95473	0.104908	9.65016	1.237
146	No minor species visible		119.444
147			116.845	4.25804	121.103	0.0112025	4.0036	1.19925	20.1963	6.7959	8.19468	0.15564	29.185	6.78617		4.25718	35.9712	0.00949513	8.30346	0.0943232	21.3257	2.0735
148			117.655	3.76492	121.42	0.00473463	5.25358	1.29251	16.7078	4.36961	8.03905	0.122682	14.1195	2.43482		3.75976	16.5544	0.00648902	8.12253	0.0718052	16.4051	1.40028
149	Shoulder		121.942	-1.00359	120.938	0.00766391	16.8302	3.69446	4.09743	0.964118	9.41233	0.160481	6.61986	0.981364		-1.00895	7.60122	0.00769422	8.67668	0.0765719		1.53782
150	Shoulder		121.406	0.861221	122.267	0.00808733	10.4521	4.29508	7.62323	3.30125	10.4145	0.33322	4.82332	1.81657
151	No minor species visible		125.155
152			125.199	-4.66116	120.538	0.0100465	4.29183	2.04655	16.5747	8.5773	14.2273	0.324583	20.2844	7.16685		-4.66967	27.4512	0.00771686	14.2793	0.139748	10.6569	1.32707
153	(Bad SNR)		120.105	-2.82414	117.281	0.0176114	4.55001	3.99695	19.3413	18.6079	18.0931	0.823538	16.2712	11.0406		-2.83806	27.3118	0.0199554	18.2597	0.345073	17.8467	3.85427
154			129.601	-7.62612	121.975	0.0115679	3.72637	2.49554	27.6253	20.2604	20.53	0.654263	4.1518	3.85473		-7.62152	8.00653	0.0182096	21.1138	0.406689	11.9284	3.00984
155	No minor species visible		124.936
156			122.229	-1.86864	120.36	0.0125496	4.68043	3.05022	18.0683	12.7541	11.3093	0.358616	11.6755	5.14655		-1.86626	16.822	0.0118031	11.4278	0.133613	11.1176	1.76521
157	Major Peak Cutted off		104.187	10.1453	114.332	0.00543861	7.28071	5.52654	10.9502	8.50614	10.3813	0.523529	7.15303	2.83038
158			119.599	3.4488	123.048	0.00924181	6.51244	5.48828	13.3402	11.438	11.2993	0.586324	3.63522	1.4254		3.4503	5.06062	0.00840895	11.2604	0.120517	5.59303	1.07029
159			111.657	9.93477	121.592	0.00513517	3.06375	0.561191	27.1779	5.61428	11.2743	0.10105	9.58716	1.35924		9.93224	10.9464	0.00479884	11.5497	0.08157	6.87626	0.640845
160			116.506	6.87685	123.383	0.00700109	4.60571	2.2501	17.0932	8.7921	11.4704	0.275611	7.89438	2.20685		6.87854	10.1012	0.00899349	11.5385	0.125093	5.86158	1.04202
161	Major Species Peak Overlap with 128.HN		123.209
162	Major Peak Cutted off		131.84	-1.45056	130.389	0.00976694	11.226	5.5692	7.06425	3.60004	8.4347	0.405466	2.47094	0.941196
	: high quality fit
	: no CEST data available, due to Proline, lacking assignment, major species peak overlap, or bad SNR
	: no minor species peak visible in CEST trace, i.e. no exchange present or overlap of minor/major species peaks
	: minor species peak only visible as shoulder of major species peak (|Dw| <0.9-1.0 ppm); d15N-data accurate, pB/kex with high error (→ not used for global fitting)

## Sheet: CEST hSpt5-KOW5
			Individual Fits (13/26 Hz)													global fit (13/26 Hz), excluding residues with Dw < 1 ppm
Residue Number	Comment		d15N (major species) (ppm)	Dw (ppm)	d15N (minor species) (ppm)	sd15N (minor species) (ppm)	pB (%)	spB (%)	kex (1/s)	skex (1/s)	R2 (major species) (1/s)	sR2 (major species) (1/s)	R2 (minor species) (1/s)	sR2 (minor species) (1/s)		Dw (ppm)	d15N (minor species) (ppm)	sd15N (minor species) (ppm)	R2 (major species) (1/s)	sR2 (major species) (1/s)	R2 (minor species) (1/s)	sR2 (minor species) (1/s)
699	No minor species visible		110.417						x	x
700	No minor species visible		121.129
701	No minor species visible		122.891
702	No minor species visible		121.753
703	Shoulder		118.283	-0.615116	117.668	0.0353842	1.9188	0.199604	76.0711	13.8214	5.90497	0.13238	25.074	6.63422		-0.924966	117.358	0.0306454	6.77722	0.130293	-12.4099	9.83467
704	Shoulder		121.525	-0.840721	120.684	0.0409107	1.60574	0.131788	102.802	16.3186	7.4289	0.136257	3.7902	7.59817		-0.928297	120.597	0.0243268	8.35901	0.125901	-20.3937	7.8384
705			120.524	1.80538	122.329	0.025224	0.835825	0.0983025	77.6238	13.5505	8.67127	0.1006	-3.15033	8.75353		1.84107	122.365	0.0165467	8.47508	0.0953838	-6.51752	7.233
706			116.745	4.57258	121.318	0.0162104	0.814607	0.0604115	95.1837	12.4606	8.33142	0.0896685	12.1364	9.66586		4.5797	121.325	0.0100316	8.34847	0.0591443	15.2757	5.46303
707			115.618	-3.0377	112.58	0.0275544	0.727899	0.0578289	119.347	16.974	8.00108	0.109793	-20.7302	14.3087		-2.99366	112.624	0.0170548	8.12452	0.0998244	-0.41978	8.32834
708	No minor species visible		119.815
709			119.909	-4.03583	115.873	0.0289887	0.809277	0.0850645	86.9642	17.1196	7.36677	0.119475	4.46314	13.9202		-4.02542	115.884	0.0105717	7.30449	0.0609324	4.10183	5.71685
710			119.016	4.06502	123.081	0.0243121	0.810074	0.0616236	112.292	16.079	8.2097	0.113154	11.0786	12.674		4.05832	123.074	0.0211068	8.38301	0.110622	24.882	10.9213
711			119.951	5.4294	125.38	0.0309832	0.983531	0.128666	66.2551	13.3569	10.4811	0.126539	21.8626	8.94332		5.4359	125.387	0.0167673	10.3481	0.113743	10.0222	8.31164
712	Bad SNR		127.342
713	Bad SNR		123.776
714			117.95	4.37987	122.33	0.0488731	0.909904	0.172053	68.1504	20.1693	11.5021	0.187735	33.6755	14.1992		4.37983	122.33	0.0241818	11.3265	0.162341	23.0591	12.7466
715	Bad SNR		110.747
716	Proline		N/A
717	Not assigned!		N/A
718	Not assigned!		N/A
719			114.77	-5.3443	109.426	0.0501188	0.980351	0.233513	85.1002	34.0362	9.20673	0.294536	11.0806	24.0898		-5.33424	109.436	0.0563592	9.26478	0.35	11.4108	28.6657
720	Bad SNR		121.63								8.12374	4.88961	-19.3499	42.3749
721			117.734	6.22523	123.959	0.0838269	1.51746	1.00182	42.1296	36.0365	20.058	0.651778	15.096	17.4248		6.35739	124.091	0.0264959	19.7658	0.352442	-3.8728	15.0761
722	No minor species visible		111.836
723	Shoulder		118.199	1.42832	119.627	0.0349106	0.748123	0.0731363	100.583	17.266	9.26494	0.115896	-19.3034	11.9862		1.38355	119.583	0.0149973	9.19931	0.0988884	-10.3192	6.90094
724	Shoulder		126.464	-1.40305	125.061	0.0362342	0.755433	0.0585683	118.175	17.0085	8.48494	0.117693	-15.1772	13.2389		-1.36095	125.103	0.0206621	8.59906	0.109969	-0.91432	8.70046
725			130.667	-4.45546	126.212	0.0318302	0.823107	0.108135	92.4589	20.4492	8.20893	0.144213	1.19882	15.0356		-4.46257	126.204	0.0208315	8.20802	0.131046	2.1865	11.3634
726			115.093	6.87025	121.963	0.0135075	0.864218	0.0552991	82.8261	9.62246	7.54709	0.0699802	14.559	7.7784		6.86875	121.962	0.010466	7.50086	0.0615016	10.3702	6.30276
727			121.884	3.12084	125.005	0.0153913	0.772903	0.0594408	102.625	13.677	8.22801	0.0956229	1.81882	10.7989		3.10053	124.985	0.0132727	8.26137	0.0789443	8.45709	7.37272
728	No minor species visible		113.46
729			118.492	4.49007	122.982	0.0950078	1.09914	0.236645	92.0316	37.4876	13.5362	0.450317	45.875	29.7445		4.68037	123.172	0.0524812	13.8253	0.355352	45.3679	28.8898
730	Bad SNR		109.162
731			117.61	-1.80319	115.807	0.0473306	0.872325	0.0900772	117.495	21.8404	8.86566	0.157694	10.4494	15.4523		-1.73554	115.874	0.0310936	9.27581	0.153021	12.2489	14.1503
732	Shoulder		125.38	1.04173	126.422	0.0500887	16.7305	10.2347	2.52835	1.61078	8.81299	0.21622	2.15411	0.947809		0.980678	126.361	0.0210014	7.89371	0.0975861	-3.20079	8.14289
733	No minor species visible		121.506
734			126.203	-4.04563	122.157	0.0287614	0.94491	0.134174	75.4778	17.1388	10.3217	0.158072	6.58758	11.9239		-4.076	122.127	0.0169544	10.2578	0.120396	-1.3044	7.92311
735			128.829	-3.74255	125.086	0.0262729	0.879713	0.0782512	94.3913	15.4053	7.90663	0.121012	-0.64453	12.8688		-3.76236	125.067	0.0203513	7.98409	0.11431	2.50403	9.89291
736			129.473	-5.70774	123.765	0.0336254	0.74809	0.105629	133.412	37.0542	8.66103	0.240952	-32.7576	30.7427		-5.68289	123.79	0.0308419	8.91912	0.197233	-2.71818	15.0417
737			123.38	-3.59533	119.785	0.0385026	1.27045	0.222724	69.1596	20.379	10.0395	0.251998	29.088	16.0586		-3.51912	119.861	0.0365963	10.1888	0.219219	17.4847	18.8684
738	Bad SNR		113.431
739			108.483	7.14761	115.631	0.0532925	1.73175	0.692885	38.7165	20.8919	11.3279	0.330839	50.4477	18.7743		7.22823	115.711	0.0463996	11.0972	0.269104	44.6211	25.3857
740			116.212	5.11837	121.33	0.0783635	1.65975	0.576246	58.7147	30.737	16.6356	0.604944	37.4927	20.4492		5.23169	121.444	0.0636282	16.7526	0.528529	32.6648	33.6515
741			119.21	3.93669	123.147	0.0197034	0.890934	0.068954	80.0295	10.6454	6.58601	0.0794771	18.2706	8.6253		3.9656	123.176	0.0135776	6.52882	0.0666095	12.9242	7.1563
742			119.59	-3.25524	116.335	0.0321206	0.789971	0.0730974	100.456	16.8036	7.70608	0.118729	5.2627	14.3185		-3.25256	116.337	0.0194478	7.74058	0.101051	12.4205	9.72126
743			121.528	2.08564	123.614	0.0382008	0.701106	0.0651445	122.387	21.2422	9.2825	0.149541	-23.8622	18.3041		2.07907	123.607	0.0203409	9.3686	0.129514	-1.9626	9.57884
744	Bad SNR		117.97
745	Shoulder		123.511	-1.45012	122.061	0.0440904	0.680826	0.0672612	127.383	22.2505	9.50375	0.148484	-25.1988	17.1163		-1.42421	122.087	0.0243047	9.54099	0.129018	-1.50491	9.58815
746			126.188	-3.07281	123.115	0.0843936	0.456598	0.0603263	584.269	131.228	12.2916	0.579089	-369.29	125.832		-2.96648	123.222	0.0333947	14.3569	0.338151	-5.7779	19.4388
747			125.12	-3.58586	121.534	0.0628358	0.680069	0.117145	126.642	40.669	13.6956	0.327428	-29.602	34.7782		-3.55697	121.563	0.0192001	13.8245	0.173773	-5.4796	9.46112
748			116.21	4.07516	120.285	0.0291197	1.19274	0.1879	63.8575	15.8368	11.2492	0.18707	24.3323	11.2532		4.10561	120.316	0.0257619	11.2291	0.18051	12.3837	13.745
749			117.595	3.75869	121.354	0.0193748	1.0099	0.103912	64.6971	10.6253	8.40683	0.0949349	20.8162	7.65073		3.78141	121.376	0.0170412	8.27247	0.0978021	7.45128	8.46719
750			116.882	6.11346	122.995	0.0296032	0.994106	0.141795	69.6733	16.0009	10.7615	0.157709	23.318	11.487		6.12934	123.011	0.0130051	10.6685	0.0946734	13.6653	7.39153
751	Shoulder		115.933	-1.44315	114.49	0.0573433	0.445104	0.0752929	346.756	79.86	13.1279	0.332358	-206.454	57.2144
752	Bad SNR		118.243
753	No minor species visible		122.836
754	No minor species visible		118.829
	: high quality fit
	: no CEST data available, due to Proline, lacking assignment, major species peak overlap, or bad SNR
	: no minor species peak visible in CEST trace, i.e. no exchange present or overlap of minor/major species peaks
	: minor species peak only visible as shoulder of major species peak (|Dw| <0.9-1.0 ppm); d15N-data accurate, pB/kex with high error (→ not used for global fitting)

## Sheet: CEST VcRfaH-KOW
			Individual Fits (13/26 Hz)													global fit (13/26 Hz), excluding residues with Dw < 1 ppm
Residue Number	Comment		d15N (major species) (ppm)	Dw (ppm)	d15N (minor species) (ppm)	sd15N (minor species) (ppm)	pB (%)	spB (%)	kex (1/s)	skex (1/s)	R2 (major species) (1/s)	sR2 (major species) (1/s)	R2 (minor species) (1/s)	sR2 (minor species) (1/s)		Dw (ppm)	d15N (minor species) (ppm)	sd15N (minor species) (ppm)	R2 (major species) (1/s)	sR2 (major species) (1/s)	R2 (minor species) (1/s)	sR2 (minor species) (1/s)
103	Shoulder		121	-0.777282	120.223	0.0516279	1.58032	4.01635	26.4164	75.4805	2.37606	0.218571	5.46089	13.7991
104	Shoulder		121.254	-0.769402	120.485	0.0212377	2.63563	3.31715	23.0773	32.7276	2.37627	0.171478	7.24242	8.29066
105	No minor species visible		123.135
106	Shoulder		121.811	-0.750027	121.061	0.0397942	2.71207	5.78071	13.7764	31.794	2.4183	0.161761	10.8995	18.152
107	Bad SNR		120.031
108	No minor species visible		125.575
109	Shoulder		114.169	-0.721733	113.447	0.0191109	3.48649	3.23132	26.9331	28.3231	3.33559	0.184212	4.76482	3.59145
110	Shoulder		124.37	-0.761149	123.609	0.0390958	2.28431	2.41167	23.3542	28.4723	3.55418	0.153198	12.0851	10.0697
111	Major species peak overlap with 130		123.606
112	Major species peak overlap with 108		125.575
113	Proline		N/A
114			117.288	4.11673	121.405	0.0218994	0.400317	0.0511816	84.6708	18.3006	6.00361	0.0626915	8.96214	14.9352		4.11319	121.401	0.0198726	6.02147	0.0475259	14.3945	9.37419
115	No minor species visible		122.628
116			115.424	-5.29569	110.128	0.0316017	0.512222	0.143602	54.1234	21.407	6.84203	0.086325	22.9282	13.4525		-5.30462	110.119	0.0327584	6.78811	0.0811061	14.0592	14.4482
117			122.569	-2.66282	119.906	0.0194977	0.385298	0.0404312	90.6079	16.0759	7.49019	0.0589663	1.44676	13.2715		-2.65274	119.916	0.0211025	7.51859	0.0599248	10.6928	10.642
118			120.687	-4.24758	116.439	0.022085	0.423402	0.0658184	73.1233	17.5816	6.63071	0.0604147	18.9373	12.0567		-4.2483	116.439	0.0206742	6.6146	0.0515562	16.6581	9.88394
119	Shoulder		121.753	1.50956	123.263	0.0337252	0.43763	0.0341643	158.119	25.1629	7.87384	0.102077	-17.8527	23.7988		1.47582	123.229	0.0234799	8.34894	0.0665225	7.90856	12.5287
120			121.321	4.19429	125.515	0.0174882	0.371475	0.0377132	98.3923	17.2761	8.41768	0.0594401	4.72311	12.8934		4.18427	125.505	0.0189178	8.46963	0.0570543	16.8752	9.52914
121			128.08	-5.94397	122.136	0.0272292	0.494182	0.0896084	59.5472	17.2189	7.55873	0.080314	35.3727	13.6936		-5.94822	122.132	0.0244603	7.52203	0.0623415	29.2621	12.045
122			131.814	-3.40526	128.409	0.0330795	0.421103	0.0823609	72.2207	23.549	6.72907	0.110301	21.6486	18.4426		-3.406	128.408	0.030129	6.69261	0.089825	20.6133	14.6025
123			116.949	3.67918	120.628	0.0242268	0.382839	0.0467389	80.9635	17.1241	6.54973	0.0584283	31.1585	14.9285		3.67426	120.623	0.019697	6.53227	0.0439689	34.4688	10.2351
124			106.019	4.03307	110.052	0.0185747	0.416639	0.0832958	77.5702	23.2288	6.57273	0.0798942	-14.3084	16.1249		4.03159	110.051	0.0198084	6.57167	0.0765655	-13.8223	11.0987
125	Shoulder		121.603	-0.905885	120.697	0.0688232	2.21471	1.62964	17.4513	17.0995	7.32435	0.229376	74.1268	46.8504		-1.40491	120.198	0.0542845	7.85326	0.120424	26.5788	26.8709
126			117.846	2.71813	120.564	0.0275162	0.422639	0.0634426	89.0232	22.0371	7.9429	0.0881178	8.13745	16.8813		2.70875	120.555	0.0254645	8.01985	0.0719687	16.0515	12.9383
127			119.39	6.25347	125.643	0.0278068	0.403223	0.0732254	79.5745	24.0694	6.76371	0.0789348	24.7382	17.8931		6.25211	125.642	0.0151385	6.76453	0.0368486	25.7754	7.69984
128			109.949	-1.95648	107.993	0.0197646	0.607656	0.141888	42.6297	14.0099	7.49072	0.0712206	22.1537	9.64986		-1.9783	107.971	0.0245498	7.40287	0.0710911	12.8463	14.2079
129	No minor species visible		120.254
130	Major species peak overlap with 111		123.606
131	No minor species visible		124.565
132	No minor species visible		118.808
133			128.47	-4.79741	123.673	0.0315589	0.509849	0.130107	51.0854	20.6494	7.45078	0.094701	33.0238	15.9322		-4.80613	123.664	0.0296473	7.37783	0.0792095	22.3818	15.3202
134			126.17	-1.73583	124.434	0.0324523	0.431871	0.127789	52.9683	21.7662	8.20792	0.0822781	14.1461	12.419		-1.7313	124.439	0.0305604	8.02187	0.079235	12.6239	14.3551
135			112.046	11.0584	123.104	0.021899	0.406868	0.054051	76.575	17.5695	7.1188	0.0619729	33.1283	13.3786		11.0578	123.104	0.0212956	7.11456	0.0519971	33.7228	10.8211
136	Proline		N/A
137			123.844	-3.9042	119.94	0.0270802	0.366263	0.0732252	88.5376	29.1406	7.03895	0.0921221	-8.94935	23.1653		-3.8943	119.95	0.021872	7.04189	0.073928	-4.61911	11.9633
138	No minor species visible		109.217
139			116.928	3.97689	120.905	0.0497843	0.424315	0.186168	65.4312	41.4119	7.34933	0.145402	-2.26176	28.3976		3.98967	120.918	0.0315855	7.29565	0.094798	-12.9565	12.4085
140	Bad SNR!		102.352
141			120.691	1.93983	122.631	0.0353475	0.32233	0.0331139	157.862	30.7957	7.13971	0.0837221	-30.2421	24.9908		1.89285	122.584	0.0284303	7.37142	0.069343	9.27333	12.8895
142	No minor species visible		115.619
143			124.149	-2.1369	122.012	0.0286538	1.44613	2.59215	14.95	28.6562	7.74315	0.212163	15.3024	21.2131		-2.17424	121.975	0.0357514	7.53756	0.0947878	15.6475	19.119
144	Shoulder		124.144
145	Shoulder		121.778	1.14323	122.921	0.0737358	0.51401	0.0731206	138.425	36.2361	7.85294	0.129381	59.2887	27.018		1.22955	123.008	0.0405477	8.30492	0.0796049	30.2185	18.4134
146			125.852	-5.4762	120.376	0.0301696	0.403768	0.0695025	86.1502	26.1231	8.01705	0.0989043	13.405	21.3446		-5.47252	120.379	0.0256833	8.04445	0.0708824	20.4703	12.3276
147			127.038	-3.14859	123.889	0.0172314	0.546579	0.0993529	51.2583	12.4994	7.42228	0.0539742	11.2972	7.19298		-3.15651	123.881	0.0181537	7.36086	0.0528713	0.79603	8.04915
148			125.303	-3.89544	121.408	0.0200332	0.507065	0.0748565	59.5441	14.6093	11.7864	0.0881965	23.3394	10.8913		-3.90239	121.401	0.0276652	11.7535	0.106438	15.4023	13.3615
149	No minor species visible		121.46
150	Bad SNR		114.145
151	Bad SNR		119.308	2.49163	121.8	0.0554611	0.297861	0.0548748	156.48	55.6362	6.42834	0.140613	-33.7691	44.6126		2.44564	121.754	0.0330315	6.59839	0.0837511	10.5792	16.5295
152	No minor species visible		121.271
153	No minor species visible		122.68
154	Proline		N/A
155			123.377	-2.50907	120.868	0.0264203	0.628297	0.178566	43.1799	17.2591	8.25395	0.0931943	18.7556	10.0427		-2.52762	120.849	0.0236186	8.18359	0.0698911	4.53358	10.5392
156			116.207	0.969527	117.177	0.0326763	0.643734	0.059122	107.434	17.4336	6.31189	0.0848745	17.6329	12.7338		1.05533	117.262	0.0261511	6.81627	0.0601734	-4.66813	11.4838
157			130.975	-8.51315	122.462	0.0294572	0.517702	0.139738	53.8389	21.0822	7.10021	0.090991	27.7176	14.2436		-8.51875	122.456	0.0318978	7.04739	0.0858054	20.111	16.044
158			127.434	-3.25315	124.181	0.0205249	0.504172	0.0966622	63.5429	17.4081	7.31782	0.0737524	4.17115	11.0227		-3.26015	124.174	0.0217341	7.31219	0.066373	-0.00073	10.0802
159			123.242	-3.30991	119.932	0.0170928	0.532766	0.102231	56.3243	14.684	7.50678	0.0609783	6.98386	8.67009		-3.3191	119.923	0.0244676	7.47231	0.0771024	-0.11115	11.938
160			107.478	6.85768	114.336	0.0220546	0.460743	0.0732006	64.7183	16.2344	7.59729	0.0660884	30.8855	12.1916		6.86069	114.339	0.0242372	7.56889	0.0640239	25.9751	12.6033
161			120.332	2.16292	122.495	0.0414376	0.311433	0.0325862	178.849	37.4401	7.0114	0.105285	-44.0029	33.4313		2.09742	122.429	0.027939	7.28802	0.0665359	17.2602	13.1147
162			115.233	5.67646	120.909	0.0243893	0.324816	0.0359266	134.254	30.6616	7.5111	0.0873312	-20.8011	27.4005		5.65888	120.892	0.0287957	7.64122	0.0777489	19.6969	13.8131
163			118.228	4.1411	122.369	0.0226	0.427084	0.063461	92.3809	23.1325	9.33866	0.100806	-9.58544	18.5985		4.13761	122.366	0.0335867	9.42339	0.119097	3.6881	15.4758
164			119.78	2.08397	121.864	0.0315382	0.345333	0.041484	125.743	26.7097	6.52199	0.0832737	-25.6487	21.6062		2.05379	121.834	0.0174509	6.66401	0.0484941	2.01611	8.05585
165			121.323	2.31647	123.639	0.0152452	0.499328	0.055878	60.9066	10.0197	4.94113	0.0377156	10.7689	7.18824		2.32607	123.649	0.0125728	4.91755	0.0275471	3.68392	5.77907
	: high quality fit
	: no CEST data available, due to Proline, lacking assignment, major species peak overlap, or bad SNR
	: no minor species peak visible in CEST trace, i.e. no exchange present or overlap of minor/major species peaks
	: minor species peak only visible as shoulder of major species peak (|Dw| <0.9-1.0 ppm); d15N-data accurate, pB/kex with high error (→ not used for global fitting)
