# Supplementary material for: Structural and thermodynamic analyses of the β-to-α transformation in RfaH reveal principles of fold-switching proteins
Source: eLife. 2022 Oct 18;11:e76630. doi: 10.7554/eLife.76630 (PMC9683785; doi:10.7554/eLife.76630)
Supplement: Figure 5—source data 2. [file elife-76630-fig5-data2.xlsx]

## Sheet: Random coil chemical shifts
hSpt5-KOW5				VcRfaH-KOW				EcRfaH-KOW
Predicted random coil value (pH 6.5)				Predicted random coil value (pH 6.5)				Experimental random coil values by assignment (8M urea, pH 6.5)																					d15N-values in 8 M urea at pH 6.5 (ppm), see also BMRB #
Residue Number	d15N (ppm)	d13CA (ppm)		Residue Number	d15N (ppm)	d13CA (ppm)		Residue Number	d1HN (ppm)	d15N (ppm)	d1HA (ppm)	d13CA (ppm)
699	111.464	45.444		103	120.753	56.914		101	N/A	N/A	4.425	63.275		Prediction with Poulsen IDP/IUP random coil chemical shifts calculator tool
700	121.216	56.123		104	121.104	55.903		102	8.481	120.9	4.28	56.482		https://spin.niddk.nih.gov/bax/nmrserver/Poulsen_rc_CS/
701	122.72	56.324		105	123.876	55.217		103	8.333	121.209	4.618	54.408
702	121.797	54.673		106	122.464	56.34		104	8.099	120.793	4.182	61.039
703	118.681	53.709		107	121.447	55.66		105	8.199	124.252	4.13	61.912
704	120.299	56.827		108	126.147	52.595		106	8.466	125.63	4.875	52.424
705	123.049	55.129		109	114.01	62.016		107	N/A	N/A	4.412	63.334
706	122.43	61.239		110	124.13	56.565		108	8.418	123.277	4.334	52.54
707	114.352	45.354		111	122.092	55.643		109	7.991	115.278	4.544	59.776
708	120.888	55.908		112	125.634	53.168		110	N/A	N/A	4.4	63.171
709	116.072	61.969		113	N/A	63.103		111	8.364	122.24	4.808	55.726
710	123.578	62.261		114	121.682	56.51		112	N/A	N/A	4.4	63.635
711	126.178	55.831		115	122.862	56.599		113	7.697	108.081	3.986	45.147
712	124.212	61.143		116	111.492	45.37		114	8.259	120.296	4.618	54.462
713	120.878	58.368		117	120.409	55.959		115	8.292	121.298	4.341	56.327
714	122.902	56.034		118	116.072	61.969		116	8.254	122.772	4.076	62.43
715	111.343	44.574		119	123.568	62.242		117	8.386	126.407	4.194	60.687
716	N/A	63.258		120	126.241	55.849		118	8.471	126.945	4.274	60.67
717	120.119	57.65		121	123.486	62.29		119	8.356	119.172	4.389	61.643
718	123.892	56.431		122	128.976	52.378		120	8.467	123.594	4.331	56.734
719	110.686	45.019		123	121.417	56.306		121	8.447	110.181	3.921	45.218
720	119.856	57.594		124	111.389	45.34		122	8.111	123.502	4.286	52.428
721	123.082	60.993		125	119.83	56.142		123	8.301	119.789	4.61	57.732
722	113.948	45.192		126	121.14	57.555		124	8.443	123.266	4.253	56.615
723	121.441	62.277		127	125.892	52.458		125	7.776	108.881	3.805	45.223
724	125.09	62.2		128	109.53	45.274		126	8.155	120.068	4.607	57.881
725	126.853	56.353		129	120.927	61.233		127	8.386	122.786	4.282	55.508
726	122.602	54.384		130	125.578	56.432		128	8.267	126.043	4.228	52.39
727	124.827	52.725		131	126.486	52.534		129	8.055	119.901	4.119	60.965
728	112.962	62.195		132	120.503	61.25		130	8.441	124.7	4.779	57.426
729	123.598	56.743		133	124.364	57.428		131	8.167	116.435	4.357	61.414
730	117.367	58.49		134	124.931	54.828		132	8.457	124.075	4.566	54.507
731	116.413	62.026		135	123.49	54.536		133	N/A	N/A	4.408	63.503
732	126.169	52.5		136	N/A	63.187		134	8.418	120.133	4.618	54.408
733	121.176	55.967		137	120.533	54.687		135	8.312	109.062	3.956	45.598
734	122.548	62.534		138	111.087	45.712		136	8.295	120.709	4.253	56.615
735	125.568	56.441		139	118.799	54.69		137	8.344	124.997	4.299	52.839
736	123.908	55.31		140	114.568	62.172		138	8.352	120.239	4.341	56.327
737	119.937	55.773		141	123.052	56.238		139	8.371	116.629	4.437	58.598
738	117.579	58.343		142	118.033	58.292		140	8.456	122.55	4.471	55.741
739	116.551	62.254		143	123.644	61.326		141	8.227	123.129	4.322	55.287
740	121.178	58.634		144	124.613	55.203		142	8.311	123.53	4.388	54.956
741	123.451	56.068		145	124.891	55.107		143	8.27	122.906	4.322	55.287
742	116.427	61.927		146	122.097	62.238		144	8.512	119.268	4.713	53.241
743	124.223	61.067		147	126.016	56.112		145	8.178	122.578	4.366	55.221
744	121.092	58.142		148	123.348	55.288		146	8.169	121.126	4.138	61.222
745	123.382	62.595		149	123.538	61.224		147	8.523	122.962	4.722	53.232
746	124.075	54.372		150	120.734	58.356		148	8.372	122.49	N/A	N/A
747	122.261	56.336		151	122.957	56.013		149	8.424	121.933	4.28	56.482
748	121.538	56.111		152	121.782	55.711		150	8.227	123.129	4.119	60.965
749	123.081	56.122		153	124.089	60.273		151	8.446	126.009	4.338	56.071
750	124.379	55.238		154	N/A	62.953		152	N/A	N/A	4.711	55.822
751	115.932	61.903		155	122.009	55.465		153	8.492	117.744	4.512	58.201
752	117.296	61.765		156	117.685	58.212		154	8.328	122.089	4.178	62.228
753	123.448	62.647		157	123.411	61.264		155	8.441	124.976	4.341	56.327
754	114.22	45.408		158	125.055	56.716		156	8.594	120.912	4.777	53.42
				159	120.388	53.333		157	8.228	114.449	4.294	61.981
				160	114.746	62.366		158	8.386	123.159	4.28	56.482
				161	121.612	54.901		159	8.289	121.942	4.61	57.732
				162	120.39	57.438		160	8.337	123.838	4.311	55.821
				163	122.131	56.476		161	8.43	124.446	4.28	56.482
				164	121.629	62.507		162	8.124	130.649	4.177	56.918
				165	118.932	61.945
