# Supplementary material for: Structural and thermodynamic analyses of the β-to-α transformation in RfaH reveal principles of fold-switching proteins
Source: eLife. 2022 Oct 18;11:e76630. doi: 10.7554/eLife.76630 (PMC9683785; doi:10.7554/eLife.76630)
Supplement: Figure 6—source data 1. [file elife-76630-fig6-data1.xlsx]

## Sheet: ANS-binding EcRfaH-KOW
EcRfaH-KOW
[urea] (M)	ANS Fluorescence at 485 nm
	w/o protein	+ EcRfaH-KOW
0	794.139	1849.01
0.52062	838.335	1682.43
1.04124	865.26	1612.88
1.56186	925.382	1462.98
2.08248	954.072	1449.52
2.6031	982.183	1355
3.12372	1045.24	1287.14
3.64434	1076.1	1294.06
4.16496	1135.13	1239.66
4.68558	1156.53	1324.33
5.2062	1180.36	1281.15
5.72682	1212.47	1328.6
6.24744	1289.77	1292.69
6.76806	1280.68	1322.33
7.28868	1331.84	1396.34
